# Supplementary material for: SPIOMET4HEALTH—efficacy, tolerability and safety of lifestyle intervention plus a fixed dose combination of spironolactone, pioglitazone and metformin (SPIOMET) for adolescent girls and young women with polycystic ovary syndrome: study protocol for a multicentre, randomised, double-blind, placebo-controlled, four-arm, parallel-group, phase II clinical trial
Source: PubMed Central journal article supplement (PMC10503102; doi:10.1186/s13063-023-07593-6), 2023-09-15
Supplement: 13063_2023_7593_MOESM2_ESM.pdf [file 13063_2023_7593_MOESM2_ESM.pdf]

**DICTAMEN DEL COMITÉ DE ÉTICA DE LA INVESTIGACIÓN  
CON MEDICAMENTOS**

Dra. Neus Riba Garcia  
Secretaria Técnica del CEIm Fundació Sant Joan de Déu

**HACE CONSTAR:**

Que el CEIm Fundació Sant Joan de Déu en su reunión del día **13/01/2022**, acta **01/2022**, ha evaluado la propuesta del promotor referida al estudio:

**Código protocolo:** SPIOMET4HEALTH

**Código EUDRACT:** 2021-003177-58

**Promotor:** Fundació Privada per a la Recerca i la Docència Sant Joan de Déu - FSJD

**Título:** *“A Phase II, randomised, multi-centric, multi-national clinical trial to evaluate the efficacy, tolerability, and safety of a fixed dose combination of Spironolactone, Pioglitazone & Metformin (SPIOMET) for adolescent girls and young adult women (AYAs) with polycystic ovary syndrome (PCOS) / Ensayo clínico de fase II, aleatorizado, multicéntrico y multinacional para evaluar la eficacia, la tolerabilidad y la seguridad de una combinación de dosis fijas de espironolactona, pioglitazona y metformina (SPIOMET) para adolescentes y mujeres adultas jóvenes con síndrome de ovario poliquístico (SOP)”*

**Investigador Principal:** Lourdes Ibañez Toda

**Centro:** Hospital Sant Joan de Déu - Esplugues HSJD.1 (FSJD)

**Código CEIm:** AC-02-22

Que se emitieron aclaraciones tras la evaluación inicial que requerían de una nueva evaluación en reunión plenaria.

Que el CEIm Fundació Sant Joan de Déu en su reunión del día **24/03/2022**, acta **07/2022**, evaluó la respuesta recibida a las aclaraciones.

Que este Comité ha realizado la evaluación de la parte I de la solicitud de autorización del ensayo, ha valorado las respuestas del promotor a las aclaraciones solicitadas (si las hubiera) y ha transmitido a la Agencia Española de medicamentos su opinión final sobre la parte I.

Que este Comité ha realizado la evaluación de la parte II de la solicitud de autorización del ensayo, de acuerdo con lo previsto en el Real Decreto 1090/2015 y en el art 7 del reglamento (UE) 536/2014 y considera que:

**CEIm Fundació Sant Joan de Déu**

- El procedimiento para obtener el consentimiento informado (incluyendo las hojas de información al sujeto de ensayo y consentimientos informados mencionados en el encabezamiento), y el plan de reclutamiento de sujetos previsto son adecuados y cumplen con los requisitos para la obtención del consentimiento informado previstos en el capítulo II del Real Decreto 1090/2015.
- Las compensaciones previstas a los participantes son adecuadas, así como las previsiones de indemnización por daños y perjuicios que pueda sufrir el participante.
- El procedimiento previsto para el manejo de datos personales es adecuado.
- El uso futuro de las muestras biológicas obtenidas durante el ensayo se adecua a lo previsto en el Real Decreto 1716/2011.
- Para la realización del ensayo se consideran adecuados los centros e investigadores previstos en el anexo II a este dictamen, teniendo en cuenta las declaraciones de idoneidad emitidas por el promotor y por los responsables de las instituciones correspondientes.

Que este Comité decidió emitir **DICTAMEN FAVORABLE** en la reunión celebrada el día **24/03/2022**, acta **07/2022**.

**Documentos con versiones:**

|                                                                                                     |                               |
|-----------------------------------------------------------------------------------------------------|-------------------------------|
| Protocolo                                                                                           | Versión 3.0 - 16/03/2022      |
| Manual del Investigador                                                                             | Versión 4.0 - septiembre 2021 |
| Hoja de información para la paciente y formulario de consentimiento informado para padres y tutores | Versión 2.0 - 24-Jan-22       |
| Hoja de información y consentimiento informado al paciente menor de edad - (12-17 años)             | Versión 3.0 - 21/03/2022      |
| Plan de la campaña de reclutamiento                                                                 | Versión 3.0 - 28Feb2022       |
| Certificado de Seguro                                                                               | Versión 04/02/2022            |
| Memoria Económica                                                                                   | Versión diciembre 2021        |

Que en dicha reunión se cumplieron los requisitos establecidos en la legislación vigente –Real Decreto 1090/2015 – para que la decisión del citado CEIm sea válida.

Que el CEIm Fundació Sant Joan de Déu, tanto en su composición como en sus procedimientos, cumple con las normas de BPC (CPMP/ICH/135/95) y con la legislación vigente que regula su funcionamiento, y que la composición del CEIm Fundació Sant Joan de Déu es la indicada en el anexo I, teniendo en cuenta que en el caso de que algún miembro participe en el ensayo o declare

## CEIm Fundació Sant Joan de Déu

---

algún conflicto de interés no habrá participado en la evaluación ni en el dictamen de la solicitud de autorización del ensayo clínico.

Lo que firmo en Esplugues de Llobregat (Barcelona), a

Fdo:

**Neus Riba  
Garcia**  Firmado  
digitalmente por  
Neus Riba Garcia  
Fecha: 2022.03.25  
13:58:49 +01'00'

**Dra. Neus Riba Garcia**  
Secretaria Técnica del CEIm Fundació Sant Joan de Déu

**Anexo I Dictamen inicial sobre la Parte II**  
**COMPOSICION DEL CEIm****Presidente:**

- Jesús Pineda Sánchez - Medicina – Pediatría

**Vicepresidente:**

- Bernabé Robles Del Olmo - Medicina – Neurología

**Secretaria:**

- Neus Riba Garcia - Farmacología Clínica

**Vocales:**

- Fernando Aguiló Martínez - Medicina Tropical
- Clara Chamorro Pérez - Jurista
- Ángel del Campo Escota - Representante de las asociaciones de pacientes
- Beatriz Del Pino Gaya - Farmacia hospitalaria
- Rosa María Dueñas Herrero - Medicina – Psiquiatría
- Pau Ferrer Salvans - Farmacología Clínica
- Joan Vinent Genestar - Farmacia hospitalaria
- María Eugènia Rey Abella - Farmacia AP
- Laura Martínez Rodríguez - Enfermería
- Marisa Serra Alacid - Medicina – Unidad Atención al Usuario
- Ana Martín Ancel - Medicina – Neonatología
- Eduard Puig Vaquero - Jurista – Delegado protección de datos
- Carlota Romans Ruiz - Farmacología Clínica
- Antoni Noguera Julián - Medicina – Pediatría
- Eurne Mazarico Gallego - Medicina – Ginecología y Obstetricia
- Esther Via Virgili - Medicina – Psiquiatría
- Oriol Martín Solé - Medicina – Cirugía y representante del CR
- Maite Gorostegui Obanos - Medicina – Oncología

Lo que firmo en Esplugues de Llobregat (Barcelona), a

Fdo:

**Neus Riba  
Garcia**

Firmado  
digitalmente por  
Neus Riba Garcia  
Fecha: 2022.03.25  
13:58:28 +01'00'

**Dra. Neus Riba Garcia**  
**Secretaria Técnica del CEIm Fundació Sant Joan de Déu**

**Anexo II Dictamen Inicial sobre la Parte II**  
**CENTROS E INVESTIGADORES PRINCIPALES PARTICIPANTES EN ESPAÑA****Código protocolo:** SPIOMET4HEALTH**Código EUDRACT:** 2021-003177-58**Promotor:** Fundació Privada per a la Recerca i la Docència Sant Joan de Déu - FSJD FSJD**Título:** *“A Phase II, randomised, multi-centric, multi-national clinical trial to evaluate the efficacy, tolerability, and safety of a fixed dose combination of Spironolactone, Pioglitazone & Metformin (SPIOMET) for adolescent girls and young adult women (AYAs) with polycystic ovary syndrome (PCOS) / Ensayo clínico de fase II, aleatorizado, multicéntrico y multinacional para evaluar la eficacia, la tolerabilidad y la seguridad de una combinación de dosis fijas de espironolactona, pioglitazona y metformina (SPIOMET) para adolescentes y mujeres adultas jóvenes con síndrome de ovario poliquístico (SOP)”***Investigador Principal:** Lourdes Ibañez Toda**Centro:** Hospital Sant Joan de Déu - Esplugues HSJD.1 (FSJD)**Código CEIm:** AC-02-22

- Lourdes Ibañez Toda. HOSPITAL SANT JOAN DE DEU.
- Abel López Bermejo. Hospital Universitari de Girona Dr. Trueta.

Lo que firmo en Esplugues de Llobregat (Barcelona), a

Fdo:

**Neus Riba  
Garcia** Firmado  
digitalmente por  
Neus Riba Garcia  
Fecha: 2022.03.25  
13:58:11 +01'00'

**Dra. Neus Riba Garcia**  
Secretaria Técnica del CEIm Fundació Sant Joan de Déu

## CERTIFICATION OF TRANSLATION

**Quote number:** 2204-03699

**Source document:** SPIOMET4HEALTH\_Spain\_Approval\_EC\_25Mar2022.pdf

**Full Title of Documents:** SPIOMET4HEALTH\_Spain\_Approval\_EC\_25Mar2022\_EN\_translated  
14Apr2022.docx

**Footer:** SPIOMET4HEALTH\_Spain\_Approval\_EC\_25Mar2022, translated into English on 14Apr2022

**Original Source Language of Document:** Spanish  
**Language Document is to be Translated into:** English

### Declaration of Translator:

I, Jan Hirš on behalf of Skrivanek s. r. o., hereby certify that the translation into English agrees with the text of the original document in Spanish language, that there were no changes/corrections made to the original document neither the translation, and that it was translated by a certified translator fluent in both above mentioned languages.

I, Jan Hirš on behalf of Skrivanek s. r. o., also confirm that the above mentioned service has been rendered and that the translated document is to the best of my knowledge a true and faithful translation of the original document as provided by the client

With Best regards,



**OPINION OF THE ETHICS COMMITTEE**  
**ON DRUGS RESEARCH**

Dr Neus Riba Garcia  
CEIm Fundació Sant Joan de Déu Technical Secretary

**CERTIFIES:**

That the CEIm Fundació Sant Joan de Déu at its meeting on **13/01/2022**, minutes **01/2022**, assessed the proposal by the developer with reference to the study:

**Protocol code:** SPIOMET4HEALTH

**EUDRACT code:** 2021-003177-58

**Developer:** Fundació Privada per a la Recerca i la Docència Sant Joan de Déu - FSJD

**Job title:** *“A Phase II, randomised, multi-centric, multi-national clinical trial to evaluate the efficacy, tolerability, and safety of a fixed dose combination of Spironolactone, Pioglitazone & Metformin (SPIOMET) for adolescent girls and young adult women (AYAs) with polycystic ovary syndrome (PCOS) / Ensayo clínico de fase II, aleatorizado, multicéntrico y multinacional para evaluar la eficacia, la tolerabilidad y la seguridad de una combinación de dosis fijas de espirolactona, pioglitazona y metformina (SPIOMET) para adolescentes y mujeres adultas jóvenes con síndrome de ovario poliquístico (SOP)”*

**Main researcher:** Lourdes Ibañez Toda

**Centre:** Hospital Sant Joan de Déu - Esplugues HSJD.1 (FSJD)

**CEIm code:** AC-02-22

That clarifications were issued after the initial assessment that required further assessment at a plenary meeting.

That the CEIm Fundació Sant Joan de Déu at its meeting on **24/03/2022**, minutes **07/2022**, assessed the response received to the clarifications.

That this Committee undertook the assessment of Part I of the request for authorisation of the trial, considered the responses from the developer regarding the clarifications requested (where applicable) and informed the Spanish Agency of Medicines and Medical Devices of its final opinion on Part I.

That this Committee undertook the assessment of Part II of the request for authorisation of the trial, in accordance with the provisions of Royal Decree 1090/2015 and art. 7 of (EU) regulation

**CEIm Fundació Sant Joan de Déu**

---

536/2014 and considers that:

- The procedure to obtain informed consent (including the information sheets for the subject of the trial and informed consent mentioned in the heading), and the subject recruitment plan anticipated are adequate and meet the requirements for obtaining informed consent as established in chapter II of Royal Decree 1090/2015.
- The payment anticipated for the participants is adequate, as is the anticipated compensation for damages and loss that may be suffered by the participant.
- The procedure anticipated for processing personal data is adequate.
- The future use of the biological samples obtained during the trial adapts to the provisions of Royal Decree 1716/2011.
- For the performance of the trial, the centres and researchers listed in Annex II of this opinion are considered adequate, considering the declarations of suitability issued by the developer and the managers of the corresponding institutions.

That this Committee decided to issue a **FAVOURABLE OPINION** at its meeting on **24/03/2022**, minutes **07/2022**.

**Documents with versions:**

|                                                                               |                              |
|-------------------------------------------------------------------------------|------------------------------|
| Protocol                                                                      | Version 3.0 - 16/03/2022     |
| Investigator's Brochure                                                       | Version 4.0 - September 2021 |
| Patient Information Sheet and Informed Consent Form for parents and guardians | Version 2.0 - 24-Jan-22      |
| Information Sheet and Informed Consent Form for minors - (12-17 years of age) | Version 3.0 - 21/03/2022     |
| Recruitment campaign plan                                                     | Version 3.0 - 28Feb2022      |
| Certificate of Insurance                                                      | Version 04/02/2022           |
| Economic Report                                                               | Version December 2021        |

That at said meeting the requirements established in current legislation (Royal Decree 1090/2015) for the decision by the CEIm to be valid were met.

That the CEIm Fundació Sant Joan de Déu, in both its composition and its procedures, complies with the GCP standards (CPMP/ICH/135/95) and with current legislation that regulates its operation, and that the composition of the CEIm Fundació Sant Joan de Déu is that stated in Annex I, taking into consideration that in the case that any member participates in the trial or



**CEIm Fundació Sant Joan de Déu**

---

declares any conflict of interest, they will not have participated in the assessment or in the opinion for the request for authorisation for clinical trial.

Signed in Esplugues de Llobregat (Barcelona), on

Signed:

Neus  
Riba

 Digitally signed by  
Neus Riba Garcia  
Date: 2022.03.25  
13:58:49 +01'00'

Dr Neus Riba Garcia

CEIm Fundació Sant Joan de Déu Technical Secretary

**Annex I Initial opinion on Part II**  
**COMPOSITION OF THE CEIm****Chairman:**

- Jesús Pineda Sánchez - Medicine – Paediatrics

**Deputy Chairman:**

- Bernabé Robles Del Olmo - Medicine – Neurology

**Secretary:**

- Neus Riba Garcia - Clinical Pharmacology

**Members:**

- Fernando Aguiló Martínez - Tropical Medicine
- Clara Chamorro Pérez - Lawyer
- Ángel del Campo Escota - Representative of the patient associations
- Beatriz Del Pino Gaya - Hospital pharmacy
- Rosa María Dueñas Herrero - Medicine – Psychiatry
- Pau Ferrer Salvans - Clinical Pharmacology
- Joan Vinent Genestar - Hospital Pharmacy
- María Eugènia Rey Abella - GP Pharmacy
- Laura Martínez Rodríguez - Nursing
- Marisa Serra Alacid - Medicine – User Support Service
- Ana Martín Ancel - Medicine – Neonatology
- Eduard Puig Vaquero - Lawyer – Data protection officer
- Carlota Romans Ruiz - Clinical Pharmacology
- Antoni Noguera Julián - Medicine – Paediatrics
- Eurne Mazarico Gallego - Medicine – Gynaecology and Obstetrics
- Esther Via Virgili - Medicine – Psychiatry
- Oriol Martín Solé - Medicine – Surgery and CR representative
- Maite Gorostegui Obanos - Medicine – Oncology

Signed in Esplugues de Llobregat (Barcelona), on

Signed:

Neus  
Riba

Digitally signed by  
Neus Riba Garcia  
Date: 2022.03.25  
13:58:49 +01'00'

Dr Neus Riba Garcia

CEIm Fundació Sant Joan de Déu Technical Secretary

**Annex II Initial Opinion on Part II**  
**MAIN CENTRES AND RESEARCHERS PARTICIPATING IN SPAIN****Protocol code:** SPIOMET4HEALTH**EUDRACT code:** 2021-003177-58**Developer:** Fundació Privada per a la Recerca i la Docència Sant Joan de Déu - FSJD**Job title:** *"A Phase II, randomised, multi-centric, multi-national clinical trial to evaluate the efficacy, tolerability, and safety of a fixed dose combination of Spironolactone, Pioglitazone & Metformin (SPIOMET) for adolescent girls and young adult women (AYAs) with polycystic ovary syndrome (PCOS) / Ensayo clínico de fase II, aleatorizado, multicéntrico y multinacional para evaluar la eficacia, la tolerabilidad y la seguridad de una combinación de dosis fijas de espironolactona, pioglitazona y metformina (SPIOMET) para adolescentes y mujeres adultas jóvenes con síndrome de ovario poliquístico (SOP)"***Main researcher:** Lourdes Ibañez Toda**Centre:** Hospital Sant Joan de Déu - Esplugues HSJD.1 (FSJD)**CEIm code:** AC-02-22

- Lourdes Ibañez Toda. HOSPITAL SANT JOAN DE DEU.
- Abel López Bermejo. Hospital Universitari de Girona Dr. Trueta.

Signed in Esplugues de Llobregat (Barcelona), on

Signed:

**Neus  
Riba** Digitally signed by  
Neus Riba Garcia  
Date: 2022.03.25  
13:58:49 +01'00'

Dr Neus Riba Garcia

CEIm Fundació Sant Joan de Déu Technical Secretary

**COMUNICAZIONE AL RICHIEDENTE, AGLI ALTRI COMITATI ETICI E AD AIFA  
DELLA DECISIONE DEL COMITATO ETICO RELATIVA AL PARERE UNICO**

Il parere finale (favorevole o non favorevole) deve essere trasmesso entro trenta giorni dalla data di ricevimento della domanda nella forma prescritta (entro sessanta giorni in caso di sperimentazione monocentrica)

**A. IDENTIFICAZIONE DELLA SPERIMENTAZIONE****A.1 Versione CTA valutata**

1.4

**A.1.1 Note**

Appendice 5 V.1.4 firmata in data 16/05/2022

**A.1.2 Numero EudraCT**

2021-003177-58

**A.2 Titolo completo della sperimentazione**

Studio clinico di fase II, randomizzato, multicentrico e multinazionale per valutare l'efficacia, la tollerabilità e la sicurezza di una combinazione a dose fissa di Spironolattone, Pioglitazone e Metformina (SPIOMET) per adolescenti e giovani adulte (AYA) con sindrome dell'ovaio policistico (PCOS)

**A.3.1 Codice del protocollo**

SPIOMET4HEALTH

**A.3.2 Versione del protocollo**

3.0

**A.3.3 Data del protocollo**

16/03/2022

**B. IDENTIFICAZIONE DEL COMITATO ETICO (CE) ISTITUITO AI SENSI DEL D.M. 8 FEBBRAIO 2013****B.1 Denominazione del CE**

COMITATO ETICO INDIPENDENTE DI AREA VASTA EMILIA CENTRO

**B.2.1 Nome del Presidente**

Elisabetta

**B.2.2 Cognome del Presidente**

Poluzzi

**B.3 Indirizzo del CE**

VIA ALBERTONI 15

**B.4 Numero di telefono**

0512141384

**B.5 Numero di fax**

0516361249

**B.6 E-mail**

cometico@aosp.bo.it

**C. IDENTIFICAZIONE DELLO SPERIMENTATORE COORDINATORE (SE STUDIO MONOCENTRICO, DELLO SPERIMENTATORE PRINCIPALE)****C.1 Nome**

Alessandra

**C.2 Cognome**

Gambineri

**C.3 Centro clinico**

AZIENDA OSPEDALIERO-UNIVERSITARIA DI BOLOGNA

**C.4 Indirizzo del centro clinico**

VIA GIUSEPPE MASSARENTI

**C.5 Reparto**

Dipartimento di Scienze Mediche e Chirurgiche

**D. DOCUMENTAZIONE ESAMINATA****D.1 Data di ricezione della domanda nella forma prescritta**

17/01/2022

**D.2 Data di ricezione di informazioni integrative (ove applicabile)****D.3 Modulo di domanda (Appendice 5)****D.4 Documentazione riportata nel modulo di domanda**

| <b>E. ELEMENTI VALUTATI (SELEZIONARE NA NEI CASI IN CUI L'INFORMAZIONE NON SIA APPLICABILE)</b>                                                                                                                |    |                                     |                                        |
|----------------------------------------------------------------------------------------------------------------------------------------------------------------------------------------------------------------|----|-------------------------------------|----------------------------------------|
| <b>E.1 Dati di qualità del medicinale sperimentale</b>                                                                                                                                                         |    |                                     |                                        |
| E.1.1 Le informazioni e i dati necessari a supportare la qualità dell'IMP sono adeguati                                                                                                                        |    |                                     | <input checked="" type="checkbox"/>    |
| E.1.2 Il promotore ha documentato che i prodotti in sperimentazione saranno preparati gestiti e conservati nel rispetto delle Norme di Buona Fabbricazione (GMP) applicabili                                   |    |                                     | <input checked="" type="checkbox"/>    |
| E.1.2.1 Eventuali elementi critici riscontrati                                                                                                                                                                 |    |                                     |                                        |
| <b>E.2 Dati di farmacologia non clinica e tossicologia</b>                                                                                                                                                     |    |                                     |                                        |
| E.2.1 Esistono presupposti solidi e rilevanti che giustificano l'avvio dello studio                                                                                                                            |    |                                     | <input checked="" type="checkbox"/>    |
| E.2.1.1 Eventuali elementi critici riscontrati                                                                                                                                                                 |    |                                     |                                        |
| <b>E.3 Dati clinici</b>                                                                                                                                                                                        |    |                                     |                                        |
| E.3.1 Esistono presupposti solidi e rilevanti che giustificano l'avvio dello studio (non applicabile per studi di fase I e II)                                                                                 | NA | <input checked="" type="checkbox"/> | Sì <input type="checkbox"/>            |
| E.3.2 Lo studio consentirà di acquisire maggiori informazioni sull'IMP di migliorare le procedure profilattiche diagnostiche e terapeutiche o la comprensione dell'eziologia e della patogenesi delle malattie |    |                                     | <input checked="" type="checkbox"/>    |
| E.3.2.1 Eventuali elementi critici riscontrati                                                                                                                                                                 |    |                                     |                                        |
| <b>E.4 Protocollo</b>                                                                                                                                                                                          |    |                                     |                                        |
| E.4.1 Gli obiettivi sono coerenti con il razionale scientifico                                                                                                                                                 |    |                                     | <input checked="" type="checkbox"/>    |
| E.4.2 Il disegno dello studio è pertinente e rilevante                                                                                                                                                         |    |                                     | <input checked="" type="checkbox"/>    |
| E.4.3 Sono stati esaminati i seguenti aspetti                                                                                                                                                                  |    |                                     |                                        |
| E.4.4 Mancanza del gruppo di controllo                                                                                                                                                                         | NA | <input checked="" type="checkbox"/> | Sì <input type="checkbox"/>            |
| E.4.5 Disegno in aperto                                                                                                                                                                                        | NA | <input checked="" type="checkbox"/> | Sì <input type="checkbox"/>            |
| E.4.6 Assenza di randomizzazione                                                                                                                                                                               | NA | <input checked="" type="checkbox"/> | Sì <input type="checkbox"/>            |
| E.4.7 Uso del placebo quale gruppo di controllo                                                                                                                                                                | NA | <input type="checkbox"/>            | Sì <input checked="" type="checkbox"/> |
| E.4.8 Disegno di equivalenza o di non inferiorità                                                                                                                                                              | NA | <input checked="" type="checkbox"/> | Sì <input type="checkbox"/>            |
| E.4.9 Lo schema di trattamento con l'IMP risulta adeguato (via di somministrazione dosaggio e posologia durata della terapia)                                                                                  |    |                                     | <input checked="" type="checkbox"/>    |
| E.4.10 Il trattamento di controllo e lo schema di trattamento sono giustificati                                                                                                                                | NA | <input type="checkbox"/>            | Sì <input checked="" type="checkbox"/> |
| E.4.11 I criteri di inclusione/esclusione sono appropriati chiari e ben definiti                                                                                                                               |    |                                     | <input checked="" type="checkbox"/>    |
| E.4.12 Gli esami le visite e le procedure previste (specie se invasive) sono idonei a verificare gli effetti del trattamento                                                                                   |    |                                     | <input checked="" type="checkbox"/>    |
| E.4.13 La misura di esito primaria è clinicamente rilevante o correlabile a una misura clinicamente rilevante                                                                                                  | NA | <input type="checkbox"/>            | Sì <input checked="" type="checkbox"/> |
| E.4.14 I metodi per rilevare la misura di esito primaria risultano adeguati                                                                                                                                    | NA | <input type="checkbox"/>            | Sì <input checked="" type="checkbox"/> |
| E.4.15 Il calendario previsto per la rilevazione dei parametri di efficacia è appropriato                                                                                                                      | NA | <input type="checkbox"/>            | Sì <input checked="" type="checkbox"/> |
| E.4.16 I parametri selezionati per la valutazione della sicurezza sono congrui                                                                                                                                 |    |                                     | <input checked="" type="checkbox"/>    |
| E.4.17 Il follow-up ha una durata sufficiente in relazione all'obiettivo dello studio                                                                                                                          |    |                                     | <input checked="" type="checkbox"/>    |
| E.4.18 La dimensione campionaria è stata calcolata in funzione della misura di esito primaria dichiarata                                                                                                       | NA | <input type="checkbox"/>            | Sì <input checked="" type="checkbox"/> |
| E.4.19 Il calcolo della dimensione campionaria è corretto in relazione alla potenza prevista per lo studio                                                                                                     | NA | <input type="checkbox"/>            | Sì <input checked="" type="checkbox"/> |
| E.4.20 Il piano statistico di analisi dei dati è coerente rispetto agli obiettivi                                                                                                                              |    |                                     | <input checked="" type="checkbox"/>    |
| E.4.21 La differenza attesa tra i trattamenti confrontati è significativa                                                                                                                                      | NA | <input type="checkbox"/>            | Sì <input checked="" type="checkbox"/> |
| E.4.22 In caso di studio di equivalenza o di non inferiorità la differenza considerata non rilevante è sufficientemente ristretta ed accettabile                                                               | NA | <input checked="" type="checkbox"/> | Sì <input type="checkbox"/>            |
| E.4.23 Il protocollo è conforme alle linee guida EMA in materia                                                                                                                                                | NA | <input checked="" type="checkbox"/> | Sì <input type="checkbox"/>            |
| E.4.23.1 Se sì al punto precedente specificarne i riferimenti:                                                                                                                                                 |    |                                     |                                        |

|                                                                                                                                                                                                                                                                                                                                    |    |                                     |                                        |
|------------------------------------------------------------------------------------------------------------------------------------------------------------------------------------------------------------------------------------------------------------------------------------------------------------------------------------|----|-------------------------------------|----------------------------------------|
| <b>E.4.24 Eventuali elementi critici riscontrati</b>                                                                                                                                                                                                                                                                               |    |                                     |                                        |
| <b>E.5 Aspetti etici</b>                                                                                                                                                                                                                                                                                                           |    |                                     |                                        |
| E.5.1 Il promotore ha documentato che la sperimentazione verrà condotta in conformità ai principi etici che traggono la loro origine dalla Dichiarazione di Helsinki, e che rispetta le GCP e le disposizioni normative applicabili                                                                                                |    |                                     | <input checked="" type="checkbox"/>    |
| E.5.2 I rischi e gli inconvenienti prevedibili sono stati soppesati rispetto al vantaggio per il soggetto incluso nella sperimentazione e per altri pazienti attuali e futuri                                                                                                                                                      |    |                                     | <input checked="" type="checkbox"/>    |
| E.5.3 Il Comitato Etico e' giunto alla conclusione che i benefici previsti dalla sperimentazione terapeutici e in materia di sanita' pubblica ne giustificano i rischi                                                                                                                                                             |    |                                     | <input checked="" type="checkbox"/>    |
| E.5.4 I diritti la sicurezza e il benessere dei soggetti dello studio hanno costituito le considerazioni piu' importanti e sono prevalsi sugli interessi della scienza e della societa'                                                                                                                                            |    |                                     | <input checked="" type="checkbox"/>    |
| E.5.5 La ricerca su persone che non sono in grado di dare il loro consenso informato e' giustificata                                                                                                                                                                                                                               | NA | <input checked="" type="checkbox"/> | Sì <input type="checkbox"/>            |
| E.5.6 Sono attesi possibili benefici diretti per il soggetto                                                                                                                                                                                                                                                                       | NA | <input type="checkbox"/>            | Sì <input checked="" type="checkbox"/> |
| E.5.7 Sono attesi possibili benefici per la collettività                                                                                                                                                                                                                                                                           | NA | <input type="checkbox"/>            | Sì <input checked="" type="checkbox"/> |
| E.5.7.1 Eventuali elementi critici riscontrati                                                                                                                                                                                                                                                                                     |    |                                     |                                        |
| <b>E.6 Informazione dei soggetti e procedure per il consenso informato</b>                                                                                                                                                                                                                                                         |    |                                     |                                        |
| E.6.1 Le informazioni per il paziente sono complete e comprensibili                                                                                                                                                                                                                                                                |    |                                     | <input checked="" type="checkbox"/>    |
| E.6.2 Le procedure previste dal protocollo sono indicate in modo esauriente                                                                                                                                                                                                                                                        |    |                                     | <input checked="" type="checkbox"/>    |
| E.6.3 I disagi e i rischi cui il paziente potrebbe essere esposto sono ben descritti                                                                                                                                                                                                                                               |    |                                     | <input checked="" type="checkbox"/>    |
| E.6.4 Le modalità di ottenimento del consenso sono ben esplicitate                                                                                                                                                                                                                                                                 |    |                                     | <input checked="" type="checkbox"/>    |
| E.6.5 Le modalità di coinvolgimento di volontari sani sono adeguate                                                                                                                                                                                                                                                                | NA | <input checked="" type="checkbox"/> | Sì <input type="checkbox"/>            |
| E.6.6 Le misure adottate per la salvaguardia della privacy del soggetto e la tutela dei dati personali sono appropriate in accordo alla normativa vigente                                                                                                                                                                          |    |                                     | <input checked="" type="checkbox"/>    |
| E.6.7 Le modalità di informazione al medico curante sono corrette e complete                                                                                                                                                                                                                                                       | NA | <input type="checkbox"/>            | Sì <input checked="" type="checkbox"/> |
| E.6.7.1 Eventuali elementi critici riscontrati                                                                                                                                                                                                                                                                                     |    |                                     |                                        |
| <b>E.7 Aspetti economici e informazioni relative a strutture e personale</b>                                                                                                                                                                                                                                                       |    |                                     |                                        |
| E.7.1 Sono stati adeguatamente valutati gli elementi della proposta di contratto tra il promotore e il centro clinico                                                                                                                                                                                                              | NA | <input type="checkbox"/>            | Sì <input checked="" type="checkbox"/> |
| E.7.2 La copertura assicurativa garantisce un'adeguata tutela dei partecipanti                                                                                                                                                                                                                                                     |    |                                     | <input checked="" type="checkbox"/>    |
| E.7.3 Gli importi le modalità di retribuzione o di compenso o di emolumenti di qualsiasi natura previsti dall'amministrazione di competenza per gli sperimentatori sono conformi alle norme vigenti adeguati rispetto all'impegno richiesto e non tali da costituire elemento determinante per la conduzione della sperimentazione | NA | <input type="checkbox"/>            | Sì <input checked="" type="checkbox"/> |
| E.7.4 E' stata considerata la congruita' dell'eventuale indennita' per i volontari sani che non deve essere tale da costituire elemento determinante per la partecipazione alla sperimentazione                                                                                                                                    | NA | <input checked="" type="checkbox"/> | Sì <input type="checkbox"/>            |
| E.7.5 E' stata esaminata l'idoneita' dello sperimentatore e dei suoi collaboratori                                                                                                                                                                                                                                                 |    |                                     | <input checked="" type="checkbox"/>    |
| E.7.6 La struttura sanitaria dove si svolgera' lo studio e' appropriata                                                                                                                                                                                                                                                            |    |                                     | <input checked="" type="checkbox"/>    |
| E.7.7 E' stato verificato che il promotore dichiara di garantire una corretta e rapida diffusione delle informazioni acquisite attraverso lo studio                                                                                                                                                                                |    |                                     | <input checked="" type="checkbox"/>    |
| E.7.7.1 Eventuali elementi critici riscontrati                                                                                                                                                                                                                                                                                     |    |                                     |                                        |

| <b>F. DECISIONE DEL COMITATO ETICO</b>                                                                                                                   |                             |                                        |                                        |
|----------------------------------------------------------------------------------------------------------------------------------------------------------|-----------------------------|----------------------------------------|----------------------------------------|
| <b>F.1 Parere unico favorevole</b>                                                                                                                       |                             | Si <input checked="" type="checkbox"/> | No <input type="checkbox"/>            |
| <b>F.2 In caso di richiesta di parere su una sperimentazione non commerciale il CE ha accertato la sussistenza dei requisiti della normativa vigente</b> | NA <input type="checkbox"/> | Si <input checked="" type="checkbox"/> | No <input type="checkbox"/>            |
| <b>F.3 Parere unico non favorevole</b>                                                                                                                   |                             | Si <input type="checkbox"/>            | No <input type="checkbox"/>            |
| <b>F.4 Sperimentazione da condurre presso</b>                                                                                                            |                             |                                        |                                        |
| <b>F.4.1 Stessa struttura</b>                                                                                                                            |                             | Si <input checked="" type="checkbox"/> | No <input type="checkbox"/>            |
| <b>F.4.2 Altra struttura</b>                                                                                                                             |                             | Si <input type="checkbox"/>            | No <input checked="" type="checkbox"/> |
| <b>F.5 Numero di pazienti previsto nel centro</b>                                                                                                        |                             |                                        |                                        |
| 54                                                                                                                                                       |                             |                                        |                                        |
| <b>F.6 Contributo lordo previsto dal promotore (per soggetto completato ove applicabile)</b>                                                             |                             |                                        |                                        |
| n . a .                                                                                                                                                  |                             |                                        |                                        |



**G. ASPETTI PARTICOLARI DELLO STUDIO CONSIDERATI NEL RILASCIO DEL PARERE UNICO FAVOREVOLE**

**G.1 Aspetti particolari dello studio considerati nel rilascio del parere unico favorevole**

Acquisita la documentazione e i chiarimenti richiesti, il Comitato Etico, nella seduta telematica del giorno 18/05/2022, esprime all'unanimità parere unico favorevole alla conduzione dello studio. Resta inteso che, in accordo con la natura non profit dello studio, non è consentito l'utilizzo dei dati e dei risultati dello studio a scopo commerciale e/o di lucro. In caso contrario, qualora si esitasse in scoperte scientifiche brevettabili o comunque sfruttabili commercialmente da qualsiasi soggetto di natura profit, occorrerà riqualificare lo studio da non profit a profit con il conseguente pagamento della tariffa prevista per il Comitato Etico e dei costi diretti e indiretti dello studio ai sensi del D. Lgs. 52/2019, previa debita informazione al Comitato per il rilascio del parere. Si precisa infine che: lo studio potrà essere avviato solo dopo aver ricevuto il nulla osta da parte della Direzione Generale della struttura sanitaria di riferimento ai sensi dell'art. 7 della L.R. n. 9/2017; ai fini del monitoraggio dell'andamento dello studio in oggetto, lo Sperimentatore Responsabile dovrà comunicare al Comitato Etico le seguenti informazioni relativamente a questo singolo centro sperimentale: data di inizio arruolamento, data di fine arruolamento e data di conclusione dello studio. In ogni caso, a partire dall'anno di approvazione dello studio e fino alla sua conclusione, almeno una volta all'anno e comunque entro e non oltre il 31 dicembre, dovrà essere fornito un rapporto annuale sullo stato di avanzamento dello studio. Per le suddette comunicazioni è possibile utilizzare il modulo disponibile sul sito web del Comitato Etico ([https://www.aosp.bo.it/files/modulo\\_monitoraggio\\_ceavec\\_v3\\_5-7-19\\_def.doc](https://www.aosp.bo.it/files/modulo_monitoraggio_ceavec_v3_5-7-19_def.doc)). Il modulo compilato, firmato e datato, andrà inviato esclusivamente in formato elettronico all'indirizzo e-mail dedicato [monitoraggiostudi@aosp.bo.it](mailto:monitoraggiostudi@aosp.bo.it) indicando nell'oggetto il nome dello Sperimentatore Responsabile locale ed il codice assegnato dal Comitato allo studio. Si precisa, infine, che il Comitato Etico è costituito in conformità al DM 08/02/2013 ai criteri per la composizione e il funzionamento dei comitati etici. Si allega elenco dei membri presenti alla valutazione. La firma del parere sull'OsSC è delegata al Dr. Giacomo Chiabrando, referente OsSC per il CE-AVEC, come da lettera di delega del Presidente datata 23/02/2022 disponibile presso la sede legale del CE-AVEC. Elenco documentazione esaminata nella seduta del 17/03/2022:

- Lettera di trasmissione della Optimapharm firmata il 17/01/2022
- Appendice 5, v. 1.0 firmata digitalmente il 13/01/2022
- Protocollo di Studio, v.2.0 del 04/12/2021
- Sinossi del Protocollo in italiano, tradotta il 15/12/2021 v. 2.0 del 04/12/2021
- Investigator's Brochure (IB) v.4.0 del Settembre 2021
- Informativa e consenso informato per i genitori/rappresentante legale, v. 1.0 del 11/11/2021
- Informativa e consenso informato per pazienti adulte, v. 1.0 del 11/11/2021
- Informativa e assenso per pazienti adolescenti, v. 1.0 del 11/11/2021
- Informativa e consenso al trattamento dati personali per genitori/rappresentante legale, v.1.0 del 16/12/2021
- Informativa e consenso al trattamento dati personali per pazienti adulte, v. 1.0 del 16/12/2021
- Scheda partecipazione paziente v. 1.1 del 27.07.2021
- Modulo centro specifico firmato il 15/02/2022
- Dichiarazione collaborazione LUM del 12/01/2022
- Lettera disponibilità Radiologia Golfieri SPIOMET4HEALTH
- Lettera disponibilità Radiologia Lovato SPIOMET4HEALTH
- Grant Agreement 899671 del 28/01/2021
- Lettera di delega del 01/10/2021
- Conferma numero EudraCT del 01/06/2021
- Scientific Advice EMA: EMA/CHMP/SAWP/282878/2017 del 18/05/2017
- Decisione PIP n. P/0150/2021 del 16/04/2021
- Investigational Medicinal Product Dossier (IMPD) v.4.0 del Settembre 2021
- Autorizzazione alla Produzione - LABORATORIO REIG JOFRÀ, S.A., Barcelona, Spain-MIA 0391-26/06/2021
- Certificato GMP - LABORATORIO REIG JOFRÀ, S.A., Barcelona, Spain-NCF/2120/001/CAT del 31/03/2021
- Contenuto dell'etichetta per il medicinale sperimentale v. 2.0 del 24/11/2021
- Polizza assicurativa del 05/11/2021
- Certificato di assicurazione del 29/11/2021
- Elenco riepilogativo delle variabili della eCRF, v. 1.0 del 04/10/2021
- Modulo notifica SAE, v. 2.0 del 02/11/2021
- Screening dei disturbi alimentari (questionario SCOFF + BEDS-7), v. 2.0 del 30.09.2021
- Opuscolo "Intervento sullo stile di vita", v. 2.0 del 05/11/2021
- Storyboard, v. 1.0 del 12/08/2021
- Descrizione del diario del paziente, v. 1.0 del 29/09/2021
- Diario del paziente e accettabilità delle compresse, v. 1.0 del 29/09/2021
- Sondaggio per i partecipanti allo studio, v 1.0 del 28/07/2021
- Opuscolo (raccolta campione salivare), v. 1.0 del 25/08/2021
- Questionario di valutazione LIP, v 1.0 del 08/08/2021
- Volantino attività di coinvolgimento del paziente, v. 1.0 del 01/07/2021
- Questionario EDE-Q, v. 6.0 del 2008
- Lettera per il pediatra/MMG, v. 2.0 del 14/12/2021
- Piano della campagna di reclutamento, v. 1.0 del 27/11/2021
- Pagina web, v. 2.0 del 08/10/2021
- Procedura operativa standard su screening per i disturbi alimentari, v. 1.0 del 24/08/2021
- Manuale - Programma di intervento sullo stile di vita per adolescenti/giovani donne con PCOS, v. 1.1 del 12/08/2021
- Scheda documentale - Vivere in salute con PCOS, v. 1.0 del 03/08/2021
- Elenco dei centri partecipanti, v. 1.0 del 25/10/2021
- CV Sperimentatore principale, Prof.ssa Alessandra Gambineri del 04/08/2021
- Certificato GCP

**G.1 Aspetti particolari dello studio considerati nel rilascio del parere unico favorevole**

Sperimentatore principale del 27/07/2016 â€¢ Dichiarazione assenza conflitto di interesse del 11/10/2021 â€¢ Checklist SPIRIT del 05/01/2022 â€¢ Dichiarazione sulla natura no profit dello studio del 13/01/2022 â€¢ Lettera di risposta alle richieste di validazione del 03/02/2022 â€¢ Bozza convenzione economica in lingua inglese del 05/07/2021 â€¢ Grant Agreement 899671, versione non firmata digitalmente del 28/01/2021 â€¢ Autodichiarazione sulla natura no-profit del Promotore del 13/09/2021 â€¢ Certificato dell'Amministrazione Statale di Amministrazione Tributaria spagnola del 17/05/2021 â€¢ Identificazione fiscale del Promotore, FSJD â€¢ Questionario per auto compilazione del 01/06/2021 â€¢ Testo per la somministrazione del colloquio del 03/12/2018 â€¢ Certificato di traduzione del questionario del 01/06/2021 â€¢ Certificato di traduzione del testo per la somministrazione colloquio del 03/12/2018 â€¢ Questionario Qualit  della Vita PCOSQ Elenco documentazione esaminata nella seduta del 18/05/2022: â€¢ Lettera di risposta ai chiarimenti da parte di Optimapharm d.o.o. datata 11/05/2022 â€¢ Appendice 5 V.1.4 firmata in data 16/05/2022 â€¢ Protocollo di Studio V.3.0 del 16/03/2022 â€¢ Investigational Medicinal Product Dossier (IMPD): o IMPD SPIOMET V.5.0 â€¢ Marzo 2022 o IMPD Pioglitazone V.2.0 â€¢ Marzo 2022 o IMPD SPIO V.2.0 â€¢ Marzo 2022 o IMPD Placebo V.2.0 â€¢ Marzo 2022 â€¢ Informative e moduli di consenso informato: o Informativa e consenso informato per i genitori/rappresentante legale V.2.0 del 10/05/2022 o Informativa e consenso informato per pazienti adulte V.2.0 del 10/05/2022 o Informativa e assenso per pazienti adolescenti V.2.0 del 10/05/2022 o Informativa sull'utilizzo futuro dei campioni per i genitori V.1.0 del 09/05/2022 o Informativa sull'utilizzo futuro dei campioni per partecipanti adulte V.1.0 del 09/05/2022 â€¢ Altro materiale da fornire al paziente: o Scheda partecipazione paziente V1.0 del 27/07/2021 o Opuscolo â€¢Intervento sullo stile di vitaâ€¢ V.2.0 del 05/11/2021 o Descrizione del diario del paziente V.1.0 del 29/09/2021 o Diario del paziente e accettabilit  delle compresse V.1.0 del 29/09/2021 o Sondaggio per i partecipanti allo studio V1.0 del 28/07/2021 o Questionario di valutazione LIP V.2.0 del 14/01/2022 o Volantino attivit  di coinvolgimento del paziente V.1.0 del 01/07/2021 o Lettera per il pediatra/MMG V.2.0 del 14/12/2021 â€¢ Disposizioni per il reclutamento dei soggetti: o Piano della campagna di reclutamento V.1.0 del 27/11/2021 o Pagina web V.2.0 del 08/10/2021 â€¢ Lettera di trasmissione risposta alle obiezioni motivate di AIFA datata 23/03/2022 â€¢ Risposta alle obiezioni motivate di AIFA datata 23/03/2022 â€¢ Dichiarazione sui composti N-nitroso del Pioglitazone datata 20/10/2021 â€¢ Rapporto sullo studio di valutazione del rischio per NDMA (nitrosodimetilammina) e NDEA (nitrosodietilammina) nella Metformina - 09/06/2020 â€¢ Certificato di idoneit  Spironolattone - 29/05/2017 â€¢ Dichiarazione di conformit  alle linee guida ICH Q3D per le impurit  elementari â€¢ Spironolattone - 02/11/2021 â€¢ Dichiarazione di origine â€¢ LIGAMED MF-2-V/K (stearato di magnesio) - 15/01/2018 â€¢ Dichiarazione sui risultati della verifica dei metodi analitici - 01/03/2022 â€¢ Studio di verifica per la determinazione di sostanze correlate della Metformina in SPIOMET - 14/12/2021 â€¢ Studio di verifica del dosaggio e dell'uniformit  del contenuto di Metformina, Pioglitazone e Spironolattone nelle compresse di SPIOMET, SPIO e PIO - 30/11/2021 â€¢ Studio di verifica per la determinazione di sostanze correlate di Pioglitazone e Spironolattone in compresse di SPIOMET, SPIO e PIO - 25/01/2022 â€¢ Studio di verifica del test di dissoluzione di Metformina, Pioglitazone e Spironolattone in compresse SPIOMET - 21/02/2022 â€¢ Studio di verifica del test di dissoluzione di Pioglitazone e Spironolattone in compresse SPIOMET - 21/02/2022 â€¢ Analisi di stabilit  del lotto SPIOMET H1756 utilizzato nello studio clinico Fase I KPI-002-CL-002 - 15/04/2021 â€¢ Studio di stabilit  di lotti di farmaco Spiomet frasco 35 comp, Spio (Spiomet) frasco 35 comp, PIO(SPIOMET) frasco 35 comp e Placebo Spiomet frasco 35 comp batch 22101E - 16/03/2022 â€¢ Autorizzazione AIFA rilasciata in data 28/03/2022

|                                                                                                                                                                              |                                                         |
|------------------------------------------------------------------------------------------------------------------------------------------------------------------------------|---------------------------------------------------------|
| <b>H. MOTIVAZIONI DEL PARERE UNICO NON FAVOREVOLE</b>                                                                                                                        |                                                         |
| <b>H.1 Protocollo</b>                                                                                                                                                        |                                                         |
| H.1.1 Rilevanza della sperimentazione                                                                                                                                        | <input type="checkbox"/>                                |
| H.1.2 Criteri di inclusione ed esclusione                                                                                                                                    | <input type="checkbox"/>                                |
| H.1.3 Gruppo di controllo                                                                                                                                                    | <input type="checkbox"/>                                |
| <b>H.2 Informazione dei soggetti e procedure per il consenso informato</b>                                                                                                   |                                                         |
| H.2.1 Procedure per il reclutamento                                                                                                                                          | <input type="checkbox"/>                                |
| H.2.2 Foglio informativo modulo per il consenso informato e procedure                                                                                                        | <input type="checkbox"/>                                |
| H.2.3 Protezione dei dati personali e confidenzialita'                                                                                                                       | <input type="checkbox"/>                                |
| <b>H.3 Aspetti etici</b>                                                                                                                                                     |                                                         |
| H.3.1 Valutazione dei benefici e dei rischi prevedibili                                                                                                                      | <input type="checkbox"/>                                |
| H.3.2 Misure per minimizzare il dolore il disagio e la paura                                                                                                                 | <input type="checkbox"/>                                |
| H.3.3 Inclusione di persone incapaci di dare validamente il proprio consenso informato e altre popolazioni vulnerabili                                                       | <input type="checkbox"/>                                |
| H.3.4 Adesione alle norme di Buona Pratica Clinica                                                                                                                           | <input type="checkbox"/>                                |
| H.4.1 Idoneita' dello sperimentatore e dei suoi collaboratori                                                                                                                | <input type="checkbox"/>                                |
| H.4.2 Adeguatezza della struttura sanitaria                                                                                                                                  | <input type="checkbox"/>                                |
| H.4.3 Contratto tra promotore e centro clinico                                                                                                                               | <input type="checkbox"/>                                |
| H.4.4 Polizza assicurativa                                                                                                                                                   | <input type="checkbox"/>                                |
| H.4.5 Indennita' per i partecipanti allo studio                                                                                                                              | <input type="checkbox"/>                                |
| H.4.6 Indennita' per gli sperimentatori                                                                                                                                      | <input type="checkbox"/>                                |
| H.4.7 Adempimenti degli obblighi amministrativi                                                                                                                              | <input type="checkbox"/>                                |
| <b>H.5 Altro</b>                                                                                                                                                             | Si <input type="checkbox"/> No <input type="checkbox"/> |
| H.5.1 Se si al punto precedente specificare                                                                                                                                  |                                                         |
| <b>I. DESCRIZIONE DELLE MOTIVAZIONI DEL PARERE UNICO NON FAVOREVOLE</b>                                                                                                      |                                                         |
| <b>I.1 Descrizione delle motivazioni del parere unico non favorevole</b>                                                                                                     |                                                         |
| <b>L. SEDUTA DEL COMITATO ETICO</b>                                                                                                                                          |                                                         |
| <b>L.1 Data della seduta</b><br>18/05/2022                                                                                                                                   |                                                         |
| <b>L.2 Numero del registro dei pareri del CE</b><br>179/2022/Farm/AOUBo                                                                                                      |                                                         |
| <b>L.3 Componenti del CE presenti e qualifiche</b><br>Elisabetta Poluzzi - Farmacologo                                                                                       |                                                         |
| <b>L.3.1 Sostituto permanente che ha partecipato alla seduta in vece del Direttore sanitario</b><br>n.a.                                                                     |                                                         |
| <b>L.4 Consulenti esterni presenti e qualifiche (ove applicabile)</b><br>n.a.                                                                                                |                                                         |
| <b>L.5 Componenti del CE presenti che non hanno partecipato alla votazione (ove applicabile)</b><br>La Dott.ssa Pelusi si astiene dalla votazione per conflitto di interessi |                                                         |

|                                                                                                        |                                                  |
|--------------------------------------------------------------------------------------------------------|--------------------------------------------------|
| <b>M. FIRMA DEL PRESIDENTE DEL COMITATO ETICO</b>                                                      |                                                  |
| <b>M.1 Il Comitato Etico ha espresso il parere unico:</b>                                              |                                                  |
| <b>M.1.1 Verificata la sussistenza del numero legale essendo presenti membri n. ____</b><br>33         |                                                  |
| <b>M.1.1.1 su n. ____</b><br>42                                                                        |                                                  |
| <b>M.1.2 Tenuto conto di eventuali osservazioni ricevute dai comitati etici collaboratori</b><br>n. a. |                                                  |
| <b>M.2 Data</b><br>27/05/2022                                                                          |                                                  |
| <b>M.2 Nome</b>                                                                                        |                                                  |
| <b>M.2.1 Cognome</b>                                                                                   |                                                  |
| <b>M.3 Firma</b>                                                                                       |                                                  |
| <b>M.4 Allega file</b>                                                                                 |                                                  |
| <b>DOCUMENTAZIONE</b>                                                                                  |                                                  |
| <b>Documentazione</b>                                                                                  |                                                  |
| Nome File:                                                                                             | elenco presenti assenti CE AVEC 18.05.2022_2.pdf |

## CERTIFICATION OF TRANSLATION

**Quote number:** 2206-00442

**Source document:** 179.2022.Farm.AOUBo\_signed.pdf

**Full Title of Documents:** 179.2022.Farm.AOUBo\_signed\_translated into English on 8June2022.docx

**Footer:** 179.2022.Farm.AOUBo\_signed\_translated into English on 8June2022

**Original Source Language of Document:** Italian

**Language Document is to be Translated into:** English

### Declaration of Translator:

I, Jan Hirš on behalf of Skrivanek s. r. o., hereby certify that the translation into English agrees with the text of the original document in Italian language, that there were no changes/corrections made to the original document neither the translation, and that it was translated by a certified translator fluent in both above mentioned languages.

I, Jan Hirš on behalf of Skrivanek s. r. o., also confirm that the above mentioned service has been rendered and that the translated document is to the best of my knowledge a true and faithful translation of the original document as provided by the client

With Best regards,

A handwritten signature in blue ink, appearing to read 'J. Hirš', is located at the bottom left of the page.

**COMMUNICATION TO THE APPLICANT, THE OTHER ETHICS COMMITTEES  
AND AIFA OF THE DECISION OF THE ETHICS COMMITTEE RELATING TO  
THE SINGLE OPINION**

The final opinion (favourable or unfavourable) must be sent within thirty days from the date of receipt of the application in the prescribed form (within sixty days in the case of monocentric experimentation)

**A. IDENTIFICATION OF THE TRIAL**

**A.1 Assessed CTA version**

1.4

**A.1.1 Note**

Annex 5 V.1.4 signed on 16/05/2022

**A.1.2 EudraCT Number**

2021-003177-58

**A.2 Complete title of the trial**

Phase II, Randomised, Multicentre, Multinational Clinical Study to Evaluate Efficacy, Tolerability and Safety of a Fixed-Dose Combination of Spironolactone, Pioglitazone, and Metformin (SPIOMET) for Adolescents and Young Adults (AYA) with Polycystic Ovary Syndrome (PCOS)

**A.3.1 Protocol Code**

SPIOMET4HEALTH

**A.3.2 Protocol Version**

3.0

**A.3.3 Protocol Date**

16/03/2022

**B. IDENTIFICATION OF THE ETHICS COMMITTEE (EC) ESTABLISHED PURSUANT TO D.M. 08/02/2013**

**B.1 Name of the EC**

INDEPENDENT ETHICS COMMITTEE OF AREA VASTA EMILIA CENTRO

**B.2.1 Forename of the President**

Elisabetta

**B.2.2 Surname of the President**

Poluzzi

**B.3 Address of the EC**

VIA ALBERTONI 15

**B.4 Telephone number**

0512141384

**B.5 Fax number**

0516361249

**B.6 Email**

cometico@aosp.bo.it

**C. IDENTIFICATION OF THE COORDINATING INVESTIGATOR (IF A MONOCENTRIC STUDY, OF THE PRINCIPAL INVESTIGATOR)****C.1 Forename**

Alessandra

**C.2 Surname**

Gambineri

**C.3 Clinical centre**

AZIENDA OSPEDALIERO-UNIVERSITARIA DI BOLOGNA

**C.4 Address of the Clinical Centre**

VIA GIUSEPPE MASSARENTI

**C.5 Section**

Department of Medical and Surgical Sciences

**D. DOCUMENTATION EXAMINED****D.1 Date of receipt of the application in the prescribed form**

17/01/2022

**D.2 Date of receipt of additional information (if applicable)****D.3 Application form (Annex 5)****D.4 Documentation reported in the application form**



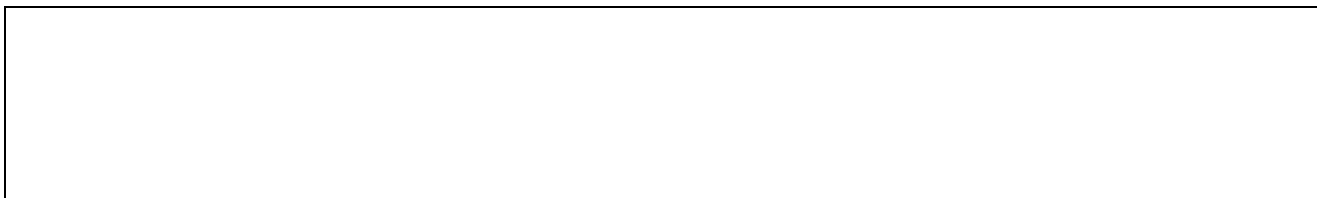

| <b>E. ELEMENTS EVALUATED (SELECT NA IN CASES WHERE THE INFORMATION IS NOT APPLICABLE)</b>                                                                                                           |    |                                     |                                         |
|-----------------------------------------------------------------------------------------------------------------------------------------------------------------------------------------------------|----|-------------------------------------|-----------------------------------------|
| <b>E.1 Quality data of the experimental drug</b>                                                                                                                                                    |    |                                     |                                         |
| E.1.1 The information and data necessary to support the quality of the IMP are adequate                                                                                                             |    |                                     | <input checked="" type="checkbox"/>     |
| E.1.2 The promoter has documented that the products under trial will be prepared, managed and stored in compliance with the applicable Good Manufacturing Standards (GMP)                           |    |                                     | <input checked="" type="checkbox"/>     |
| E.1.2.1 Any critical elements found                                                                                                                                                                 |    |                                     |                                         |
| <b>E.2 Non-clinical pharmacology and toxicology data</b>                                                                                                                                            |    |                                     |                                         |
| E.2.1 There are solid and relevant assumptions that justify the start of the study                                                                                                                  |    |                                     | <input checked="" type="checkbox"/>     |
| E.2.1.1 Any critical elements found                                                                                                                                                                 |    |                                     |                                         |
| <b>E.3 Clinical data</b>                                                                                                                                                                            |    |                                     |                                         |
| E.3.1 There are strong and relevant assumptions justifying the initiation of the study (not applicable for phase I and II studies)                                                                  | NA | <input checked="" type="checkbox"/> | Yes <input type="checkbox"/>            |
| E.3.2 The study will make it possible to acquire more information on IMP to improve diagnostic and therapeutic prophylactic procedures or to understand the aetiology and pathogenesis of diseases. |    |                                     | <input checked="" type="checkbox"/>     |
| E.3.2.1 Any critical elements found                                                                                                                                                                 |    |                                     |                                         |
| <b>E.4 Protocol</b>                                                                                                                                                                                 |    |                                     |                                         |
| E.4.1 The objectives are consistent with the scientific rationale                                                                                                                                   |    |                                     | <input checked="" type="checkbox"/>     |
| E.4.2 The study design is pertinent and relevant                                                                                                                                                    |    |                                     | <input checked="" type="checkbox"/>     |
| E.4.3 The following aspects were examined                                                                                                                                                           |    |                                     |                                         |
| E.4.4 Lack of control group                                                                                                                                                                         | NA | <input checked="" type="checkbox"/> | Yes <input type="checkbox"/>            |
| E.4.5 Open design                                                                                                                                                                                   | NA | <input checked="" type="checkbox"/> | Yes <input type="checkbox"/>            |
| E.4.6 No randomisation                                                                                                                                                                              | NA | <input checked="" type="checkbox"/> | Yes <input type="checkbox"/>            |
| E.4.7 Use of placebo as a control group                                                                                                                                                             | NA | <input type="checkbox"/>            | Yes <input checked="" type="checkbox"/> |
| E.4.8 Equivalence or non-inferiority design                                                                                                                                                         | NA | <input checked="" type="checkbox"/> | Yes <input type="checkbox"/>            |
| E.4.9 The treatment schedule with the IMP is adequate (route of administration, dosage and posology, duration of therapy)                                                                           |    |                                     | <input checked="" type="checkbox"/>     |
| E.4.10 The control treatment and the treatment method are justified                                                                                                                                 | NA | <input type="checkbox"/>            | Yes <input checked="" type="checkbox"/> |
| E.4.11 The inclusion/exclusion criteria are appropriate clear and well defined                                                                                                                      |    |                                     | <input checked="" type="checkbox"/>     |
| E.4.12 The examinations, visits and planned procedures (especially if invasive) are suitable for checking the effects of the treatment                                                              |    |                                     | <input checked="" type="checkbox"/>     |
| E.4.13 The primary outcome measure is clinically relevant or correlated with a clinically relevant measure                                                                                          | NA | <input type="checkbox"/>            | Yes <input checked="" type="checkbox"/> |
| E.4.14 The methods for taking the primary outcome measure are adequate                                                                                                                              | NA | <input type="checkbox"/>            | Yes <input checked="" type="checkbox"/> |
| E.4.15 The schedule foreseen for detecting the efficacy parameters is appropriate                                                                                                                   | NA | <input type="checkbox"/>            | Yes <input checked="" type="checkbox"/> |
| E.4.16 The parameters selected for the safety evaluation are congruous                                                                                                                              |    |                                     | <input checked="" type="checkbox"/>     |
| E.4.17 The follow-up is of sufficient duration in relation to the objective of the study                                                                                                            |    |                                     | <input checked="" type="checkbox"/>     |
| E.4.18 The sample size was calculated on the basis of the primary outcome measure declared                                                                                                          | NA | <input type="checkbox"/>            | Yes <input checked="" type="checkbox"/> |
| E.4.19 The calculation of the sample size is correct in relation to the power expected for the study                                                                                                | NA | <input type="checkbox"/>            | Yes <input checked="" type="checkbox"/> |
| E.4.20 The statistical data analysis plan is consistent with the objectives                                                                                                                         |    |                                     | <input checked="" type="checkbox"/>     |
| E.4.21 The expected difference between the treatments compared is significant                                                                                                                       | NA | <input type="checkbox"/>            | Yes <input checked="" type="checkbox"/> |
| E.4.22 In the case of an equivalence or non-inferiority study, the difference considered not relevant is sufficiently small and acceptable                                                          | NA | <input checked="" type="checkbox"/> | Yes <input type="checkbox"/>            |
| E.4.23 The protocol complies with the relevant EMA guidelines                                                                                                                                       | NA | <input checked="" type="checkbox"/> | Yes <input type="checkbox"/>            |
| <b>E.4.23.1 If yes is answered to the previous point, specify the references:</b>                                                                                                                   |    |                                     |                                         |

|                                                                                                                                                                                                                                                                                                                                |    |                                     |                                         |
|--------------------------------------------------------------------------------------------------------------------------------------------------------------------------------------------------------------------------------------------------------------------------------------------------------------------------------|----|-------------------------------------|-----------------------------------------|
| <b>E.4.24 Any critical elements found</b>                                                                                                                                                                                                                                                                                      |    |                                     |                                         |
| <b>E.5 Ethical elements</b>                                                                                                                                                                                                                                                                                                    |    |                                     |                                         |
| <b>E.5.1 The promoter has documented that the trial will be conducted in compliance with the ethical principles that originate from the Declaration of Helsinki, and which respects the GCP and applicable regulatory provisions</b>                                                                                           |    |                                     | <input checked="" type="checkbox"/>     |
| <b>E.5.2 The foreseeable risks and inconveniences have been weighed against the benefit for the subject included in the trial and for other current and future patients</b>                                                                                                                                                    |    |                                     | <input checked="" type="checkbox"/>     |
| <b>E.5.3 The Ethics Committee has come to the conclusion that the benefits envisaged by the therapeutic and public health experimentation justify the risks</b>                                                                                                                                                                |    |                                     | <input checked="" type="checkbox"/>     |
| <b>E.5.4 The rights to safety and well-being of the study subjects have constituted the most important considerations and prevailed over the interests of science and society</b>                                                                                                                                              |    |                                     | <input checked="" type="checkbox"/>     |
| <b>E.5.5 Research on people who are unable to give their informed consent is justified</b>                                                                                                                                                                                                                                     | NA | <input checked="" type="checkbox"/> | Yes <input type="checkbox"/>            |
| <b>E.5.6 Possible direct benefits for the subject are expected</b>                                                                                                                                                                                                                                                             | NA | <input type="checkbox"/>            | Yes <input checked="" type="checkbox"/> |
| <b>E.5.7 Possible benefits for the community are expected</b>                                                                                                                                                                                                                                                                  | NA | <input type="checkbox"/>            | Yes <input checked="" type="checkbox"/> |
| <b>E.5.7.1 Any critical elements found</b>                                                                                                                                                                                                                                                                                     |    |                                     |                                         |
| <b>E.6 Information for subjects and procedures for informed consent</b>                                                                                                                                                                                                                                                        |    |                                     |                                         |
| <b>E.6.1 Patient information is complete and understandable</b>                                                                                                                                                                                                                                                                |    |                                     | <input checked="" type="checkbox"/>     |
| <b>E.6.2 The procedures foreseen by the protocol are indicated in detail</b>                                                                                                                                                                                                                                                   |    |                                     | <input checked="" type="checkbox"/>     |
| <b>E.6.3 The inconveniences and risks that the patient could be exposed to are well described</b>                                                                                                                                                                                                                              |    |                                     | <input checked="" type="checkbox"/>     |
| <b>E.6.4 The methods of obtaining consent are well explained</b>                                                                                                                                                                                                                                                               |    |                                     | <input checked="" type="checkbox"/>     |
| <b>E.6.5 The ways of involving healthy volunteers are adequate</b>                                                                                                                                                                                                                                                             | NA | <input checked="" type="checkbox"/> | Yes <input type="checkbox"/>            |
| <b>E.6.6 The measures adopted to safeguard the privacy of the subject and the protection of personal data are appropriate in accordance with current legislation</b>                                                                                                                                                           |    | <input type="checkbox"/>            | <input checked="" type="checkbox"/>     |
| <b>E.6.7 The procedures for informing the attending doctor are correct and complete</b>                                                                                                                                                                                                                                        | NA | <input type="checkbox"/>            | Yes <input checked="" type="checkbox"/> |
| <b>E.6.7.1 Any critical elements found</b>                                                                                                                                                                                                                                                                                     |    |                                     |                                         |
| <b>E.7 Economic aspects and information relating to facilities and persons</b>                                                                                                                                                                                                                                                 |    |                                     |                                         |
| <b>E.7.1 The elements of the draft contract between the promoter and the clinical centre have been adequately assessed</b>                                                                                                                                                                                                     | NA | <input type="checkbox"/>            | Yes <input checked="" type="checkbox"/> |
| <b>E.7.2 The insurance coverage guarantees appropriate protection of the participants</b>                                                                                                                                                                                                                                      |    |                                     | <input checked="" type="checkbox"/>     |
| <b>E.7.3 The modalities of remuneration or compensation or emoluments of any nature provided by the competent authorities for the researchers are in compliance with current regulations appropriate with respect to the required commitment and not such as to constitute a decisive element for the conduct of the trial</b> | NA | <input type="checkbox"/>            | Yes <input checked="" type="checkbox"/> |
| <b>E.7.4 The appropriateness of any indemnity for healthy volunteers has been considered which must not be such as to constitute a determining factor for participation in the trial</b>                                                                                                                                       | NA | <input checked="" type="checkbox"/> | Yes <input type="checkbox"/>            |
| <b>E.7.5 The suitability of the researcher and their staff was examined</b>                                                                                                                                                                                                                                                    |    |                                     | <input checked="" type="checkbox"/>     |
| <b>E.7.6 The health facility where the study will take place is appropriate</b>                                                                                                                                                                                                                                                |    |                                     | <input checked="" type="checkbox"/>     |
| <b>E.7.7 It has been verified that the promoter declares to guarantee a correct and rapid dissemination of the information acquired through the study</b>                                                                                                                                                                      |    |                                     | <input checked="" type="checkbox"/>     |
| <b>E.7.7.1 Any critical elements found</b>                                                                                                                                                                                                                                                                                     |    |                                     |                                         |

| <b>F. DECISION OF THE ETHICS COMMITTEE</b>                                                                                                                     |                                                          |                                                                     |                                     |
|----------------------------------------------------------------------------------------------------------------------------------------------------------------|----------------------------------------------------------|---------------------------------------------------------------------|-------------------------------------|
| <b>F.1 Single and favourable opinion</b>                                                                                                                       |                                                          | Yes <input checked="" type="checkbox"/>                             | No <input type="checkbox"/>         |
| <b>F.2 In the event of a request for an opinion on a non-commercial trial, the EC has ascertained the existence of the requirements of current legislation</b> | NA <input type="checkbox"/> Yes <input type="checkbox"/> | <input checked="" type="checkbox"/>                                 | No <input type="checkbox"/>         |
| <b>F.3 Single and unfavourable opinion</b>                                                                                                                     |                                                          | Yes <input type="checkbox"/> No <input type="checkbox"/>            | <input type="checkbox"/>            |
| <b>F.4 Trial to be conducted at</b>                                                                                                                            |                                                          |                                                                     |                                     |
| <b>F.4.1 Same structure</b>                                                                                                                                    |                                                          | Yes <input checked="" type="checkbox"/> No <input type="checkbox"/> | <input type="checkbox"/>            |
| <b>F.4.2 Other structure</b>                                                                                                                                   |                                                          | Yes <input type="checkbox"/> No <input type="checkbox"/>            | <input checked="" type="checkbox"/> |
| <b>F.5 Number of patients envisaged at the centre</b>                                                                                                          |                                                          |                                                                     |                                     |
| 54                                                                                                                                                             |                                                          |                                                                     |                                     |
| <b>F.6 Gross contribution expected by the promoter (per completed subject where applicable)</b>                                                                |                                                          |                                                                     |                                     |
| n . a .                                                                                                                                                        |                                                          |                                                                     |                                     |

**G. SPECIAL ASPECTS OF THE STUDY CONSIDERED IN THE ISSUE OF THE SINGLE FAVOURABLE OPINION**

**G.1 SPECIAL ASPECTS OF THE STUDY CONSIDERED IN THE ISSUE OF THE SINGLE FAVOURABLE OPINION**

Having acquired the required documentation and clarifications, the Ethics Committee, in the electronic session on 18/05/2022, unanimously expresses a single opinion in favour of conducting the study.

It is understood that, in accordance with the non-profit nature of the study, the use of the data and results of the study for commercial and / or profit-making purposes is not permitted. Otherwise, should there be any scientific discoveries that can be patented or otherwise exploited commercially by any for-profit entity, it will be necessary to re-qualify the study from non-profit to profit with the consequent payment of the fee provided for the Ethics Committee and the direct and indirect costs of the study. pursuant to Legislative Decree 52/2019, subject to due information to the Committee for the issue of the opinion. Finally, it should be noted that: â € the study may be started only after having received the authorisation from the General Management of the reference healthcare facility pursuant to art. 7 of L.R. no. 9/2017; â € for the purposes of monitoring the progress of the study in question, the Lead Investigator must communicate the following information to the Ethics Committee regarding this single trial centre: enrolment start date, enrolment end date and study end date. In any case, starting from the year of approval of the study and until its conclusion, at least once a year and in any case no later than 31 December, an annual report on the progress of the study must be provided. For the aforementioned communications it is possible to use the form available on the website of the Ethics Committee ([https://www.aosp.bo.it/files/modulo\\_monitoraggio\\_ceavec\\_v3\\_5-7-19\\_def.doc](https://www.aosp.bo.it/files/modulo_monitoraggio_ceavec_v3_5-7-19_def.doc)). The completed, signed and dated form shall be sent exclusively in electronic format to the dedicated email address [monitoraggiostudi@aosp.bo.it](mailto:monitoraggiostudi@aosp.bo.it) indicating in the subject line the name of the local Lead Investigator and the code assigned by the Committee to the study.. Finally, it should be noted that the Ethics Committee is set up in compliance with Ministerial Decree 08/02/2013 on criteria

for the composition and functioning of ethics committees. A list of the members present at the evaluation is attached. The signing of the opinion on the OsSC is delegated to Dr. Giacomo Chiabrando, OsSC contact person for the CE-AVEC, as per the letter of delegation from the President dated 23/02/2022 available at the CE-AVEC registered office. List of documents examined in the session of 17/03/2022: â € transmission letter signed on 17/01/2022 â € Annex 5, v. 1.0 digitally signed on 13/01/2022 â € Study Protocol, v.2.0 of 04/12/2021 â €

Synopsis of the Protocol in Italian, translated on 15/12/2021 v. 2.0 dated 04/12/2021 â € Investigator's Brochure (IB) v.4.0 dated September 2021 â € Information and informed consent for parents/legal guardian, v. 1.0 dated 11/11/2021 â € Information and informed consent for adult patients, v. 1.0 dated 11/11/2021 â € Information and consent for adolescent patients, v. 1.0 dated 11/11/2021 â €

Information and consent to the processing of personal data for parents / legal guardian, v1.0 of 16/12/2021 â € Information and consent to the processing of personal data for adult patients, v. 1.0 dated 16/12/2021 â € Patient participation form v. 1.1 dated 27.07.2021 â € Specific centre form signed on 15/02/2022 â € LUM collaboration declaration dated 12/01/2022 â € Availability letter for Radiology Golfieri SPIOMET4HEALTH â € Availability letter for Radiology Lovato SPIOMET4HEALTH â € Grant Agreement 899671 of 28/01/2021 â € Proxy letter dated 01/10/2021 â € EudraCT number confirmation dated 01/06/2021 â € Scientific Advice EMA: EMA/CHMP/SAWP/282878/2017 of 18/05/2017 â € PIP Decision No. P/0150/2021 of 16/04/2021 â € Investigational Medicinal Product Dossier (IMPD) v.4.0 of September 2021 â € Production Authorisation - LABORATORY REIG JOFRÃ, S.A., Barcelona, Spain-MIA 0391-26/06/2021 â €

GMP Certificate - LABORATORY REIG JOFRÃ, S.A., Barcelona, Spain-NCF/2120/001/CAT of 31/03/2021 â € Contents of the label for the investigational drug v. 2.0 dated 24/11/2021 Insurance policy dated 05/11/2021 â € Insurance certificate dated 29/11/2021 â € Summary list of the variables of the eCRF, v. 1.0 dated 04/10/2021 â € SAE notification form, v. 2.0 dated 02/11/2021 â € Screening of eating disorders (SCOFF + BEDS-7 questionnaire), v. 2.0 dated 30.09.2021 â € Brochure â € Intervention on lifestyles, v. 2.0 dated 05/11/2021 â € Storyboard, v. 1.0 dated 12/08/2021 â € Description of the patient's diary, v. 1.0 dated 29/09/2021 â €

Patient diary and tablet acceptability, see. 1.0 dated 29/09/2021 â€¢ Survey for study participants, v 1.0 dated 28/07/2021 â€¢ Brochure (salivary sample collection), v. 1.0 dated 25/08/2021 â€¢ LIP evaluation questionnaire, v 1.0 dated 08/08/2021 â€¢ Patient involvement activity flyer, v. 1.0 dated 01/07/2021 â€¢ EDE-Q questionnaire, v. 6.0 of 2008 â€¢ Letter for the paediatrician / GP, v. 2.0 dated 14/12/2021 â€¢ Plan of the recruitment campaign, v. 1.0 of 27/11/2021 â€¢ Web page, v. 2.0 dated 08/10/2021 â€¢ Standard operating procedure on screening for eating disorders, see 1.0 dated 24/08/2021 â€¢ Manual - Lifestyle intervention program for adolescents/young women with PCOS, v. 1.1 dated 12/08/2021 â€¢ Documentary sheet - Living in health with PCOS, v. 1.0 dated 03/08/2021 â€¢ List of participating centres, see 1.0 dated 25/10/2021 â€¢ CV Main Investigator, Prof. Alessandra Gambineri dated 04/08/2021 â€¢ GCP Certificate

**G.1 SPECIAL ASPECTS OF THE STUDY CONSIDERED IN THE ISSUE OF THE SINGLE FAVOURABLE OPINION**

Principal Investigator dated 27/07/2016 â€ Declaration of absence of conflict of interest dated 11/10/2021 â€ SPIRIT Check-list dated 05/01/2022 â€ Declaration on the non-profit nature of the study dated 13/01/2022 â€ Letter of response to the validation requests of 03/02/2022 â€ Draft economic agreement in English of 05/07/2021 â€ Grant Agreement 899671, digitally unsigned version of 28/01/2021 â€ Self-declaration on the non-profit nature of the Promoter dated 13/09/2021 â€ Certificate from the Spanish State Tax Administration dated 17/05/2021 â€ Tax identification of the Promoter, FSJD â€ Questionnaire for self-compilation dated 01/06/2021 â€ Text for the administration of the interview dated 03/12/2018 â€ Translation certificate of the questionnaire dated 01/06/2021 â€

Certificate of translation of the text for the interview administration of 03/12/2018 â€ PCOSQ Quality of Life questionnaire List of documents examined in the session of 18/05/2022: â€ Letter of response to clarifications by Optimapharm d.o.o. dated 11/05/2022 â€ Annex 5 V.1.4 signed on 16/05/2022 â€ Study Protocol V.3.0 dated 16/03/2022 â€ Investigational Medicinal Product Dossier (IMPD): o

IMPD SPIOMET V.5.0 â March 2022 or IMPD Pioglitazone V.2.0 â March 2022 or IMPD SPIO V.2.0 â March 2022 or IMPD Placebo V.2.0 â March 2022 â €

Information and informed consent forms: o Information and informed consent for parents/legal representative V.2.0 of 10/05/2022 o Information and informed consent for adult patients V.2.0 of 10/05/2022 o Information and consent for patients adolescents V.2.0 of 10/05/2022 o Information on the future use of samples for parents V.1.0 of 09/05/2022 o Information on the future use of samples for adult participants V.1.0 of 09/05/2022 â€ Other material to be provided to the patient: o Patient participation form V1.0 dated 27/07/2021 o

Leaflet Intervention on life styles V.2.0 dated 05/11/2021 o

Description of the patient's diary V.1.0 of 29/09/2021 o Patient's diary and acceptability of tablets V.1.0 of 29/09/2021 o Survey for study participants V1.0 of 28/07/2021 o Questionnaire of LIP evaluation V.2.0 dated 14/01/2022 o

Patient Involvement Activity Flyer V.1.0 dated 01/07/2021 or Letter to the paediatrician/GP V.2.0 dated 14/12/2021 â € Provisions for the recruitment of subjects: o Recruitment campaign plan V.1.0 dated 27/11/2021 or Web page V.2.0 of 08/10/2021 â€ Letter of transmission of response to AIFA's reasoned objections dated 23/03/2022 â€ Response to AIFA's reasoned objections dated 23/03/2022 â€

Pioglitazone N-Nitrous Compound Statement dated 20/10/2021 â€ NDMA

(Nitrosodimethylamine) Risk Assessment Study Report and NDEA (nitrosodiethylamine) in Metformin - 09/06/2020 â€ Certificate of Spironolactone suitability - 29/05/2017 â€ Declaration of compliance with ICH Q3D guidelines for elementary impurities â Spironolactone - 02/11/2021 â€ Declaration of origin â LIGAMED MF-2-V/K (magnesium stearate) - 15/01/2018 â€ Statement on the results of the verification of the analytical methods - 01/03/2022 â € Verification study for the determination of related substances of Metformin in SPIOMET - 12/14/2021 â€

Study to verify the dosage and uniformity of the content of Metformin, Pioglitazone and Spironolactone in SPIOMET, SPIO and PIO tablets - 30/11/2021 â€

Verification study for the determination of related substances of Pioglitazone and Spironolactone in SPIOMET, SPIO and PIO tablets - 25/01/2022 â€ Verification study of the dissolution test of Metformin, Pioglitazone and Spironolactone in SPIOMET tablets - 21/02/2022 â€ Verification study of the dissolution test of Pioglitazone and Spironolactone in SPIOMET tablets - 21/02/2022 â€ Stability analysis of the SPIOMET H1756 batch used in the Phase I clinical study KPI-002-CL-002 - 15/04/2021 â€ Stability study of drug batches Spiomet frasco 35 comp, Spio (Spiomet) frasco 35 comp, PIO (SPIOMET) frasco 35 comp and Placebo Spiomet frasco 35 comp batch 22101E - 16/03/2022 â€ AIFA authorisation issued on 28/03/2022



| <b>H. REASONING FOR THE UNFAVOURABLE SINGLE OPINION</b>                                                  |                                                             |
|----------------------------------------------------------------------------------------------------------|-------------------------------------------------------------|
| <b>H.1 Protocol</b>                                                                                      |                                                             |
| H.1.1 Relevance of the trial                                                                             | <input type="checkbox"/>                                    |
| H.1.2 Inclusion and exclusion criteria                                                                   | <input type="checkbox"/>                                    |
| H.1.3 Control group                                                                                      | <input type="checkbox"/>                                    |
| <b>H.2 Information for subjects and procedures for informed consent</b>                                  |                                                             |
| H.2.1 Recruitment procedure                                                                              | <input type="checkbox"/>                                    |
| H.2.2 Information sheet for informed consent form and procedures                                         | <input type="checkbox"/>                                    |
| H.2.3 Personal data protection and confidentiality                                                       | <input type="checkbox"/>                                    |
| <b>H.3 Ethical elements</b>                                                                              |                                                             |
| H.3.1 Assessment of foreseeable risks and benefits                                                       | <input type="checkbox"/>                                    |
| H.3.2 Measures to minimise pain, discomfort and fear                                                     | <input type="checkbox"/>                                    |
| H.3.3 Inclusion of people unable to validly give their informed consent and other vulnerable populations | <input type="checkbox"/>                                    |
| H.3.4 Adhesion to the rules of Good Clinical Practice                                                    | <input type="checkbox"/>                                    |
| H.4.1 Suitability of the researcher and their collaborators                                              | <input type="checkbox"/>                                    |
| H.4.2 Suitability of the health facility                                                                 | <input type="checkbox"/>                                    |
| H.4.3 Contact between promoter and clinical centre                                                       | <input type="checkbox"/>                                    |
| H.4.4 Insurance policy                                                                                   | <input type="checkbox"/>                                    |
| H.4.5 Payment for study participants                                                                     | <input type="checkbox"/>                                    |
| H.4.6 Payment for researchers                                                                            | <input type="checkbox"/>                                    |
| H.4.7 Compliance with the administrative obligations                                                     | <input type="checkbox"/>                                    |
| <b>H.5 Other</b>                                                                                         | Yes <input type="checkbox"/> No <input type="checkbox"/>    |
| H.5.1 If yes is answered to the previous point, specify                                                  |                                                             |
| <b>I. DESCRIPTION OF THE REASONING FOR THE UNFAVOURABLE SINGLE OPINION</b>                               |                                                             |
| <b>L.1 Description of the reasoning for the unfavourable single opinion</b>                              |                                                             |
| <b>L. DECISION OF THE ETHICS COMMITTEE</b>                                                               |                                                             |
| <b>L.1 Date of the meeting</b>                                                                           | 18/05/2022                                                  |
| <b>L.2 Number of the EC opinions register</b>                                                            | 179/2022/Farm/AOUBo                                         |
| <b>L.3 Members of the EC present and qualifications</b>                                                  | Elisabetta Poluzzi - Pharmacologist                         |
| <b>L.3.1 Permanent substitute who attended the session in place of the Medical Director</b>              | n.a.                                                        |
| <b>L.4 External consultants present and qualifications (where applicable)</b>                            | n.a.                                                        |
| <b>L.5 EC members present who did not participate in the vote (where applicable)</b>                     | Dr. Pelusi abstains from voting due to conflict of interest |

|                                                                                           |                                                  |
|-------------------------------------------------------------------------------------------|--------------------------------------------------|
| <b>M. SIGNATURE OF THE CHAIRMAN OF THE ETHICS COMMITTEE</b>                               |                                                  |
| <b>M.1 The Committee expressed the single opinion</b>                                     |                                                  |
| <b>M.1.1 Once the existence of the quorum has been verified, with number of members _</b> |                                                  |
| 33                                                                                        |                                                  |
| <b>M.1.1.1 on No. ____</b>                                                                |                                                  |
| 42                                                                                        |                                                  |
| <b>M.1.2 Having regard to any comments received from the ethics committees</b>            |                                                  |
| n . a .                                                                                   |                                                  |
| <b>M.2 Date</b>                                                                           |                                                  |
| 27/05/2022                                                                                |                                                  |
| <b>M.2 Forename</b>                                                                       |                                                  |
| <b>M.2.1 Surname</b>                                                                      |                                                  |
| <b>M.3 Signature</b>                                                                      |                                                  |
| <b>M.4 Attach file</b>                                                                    |                                                  |
| <b>DOCUMENTATION</b>                                                                      |                                                  |
| <b>Documentation</b>                                                                      |                                                  |
| File Name:                                                                                | elenco presenti assenti CE AVEC 18.05.2022_2.pdf |

Pernille Ravn  
Odense universitetshospital  
Gynækologisk Obstetrisk Afdeling D  
Kløvervænget 23, Indgang 55, 2. sal,  
5000 Odense C

Dato: 28. april 2022  
Projekt-ID: **S-20220006**  
Acadrenr: 22/6638.  
Heidi Lund Olesen /  
Betina Simonsen

**Forskningsprojekt: Et randomiseret, multi-center, multinationalt klinisk fase II-forsøg med henblik på at evaluere effektiviteten, tolerancen og sikkerheden af en fast dosis kombination af spironolacton, pioglitazon og metformin (SPIOMET) til unge piger og unge voksne kvinder (AYA) med polycystisk ovariesyndrom (PCOS).**

Den Videnskabetiske Komité 2 for Region Syddanmark har nu truffet endelig afgørelse om **godkendelse af dit projekt**. Komitéen har den 13. april 2022 modtaget revideret materiale. Projektmateriale opfylder nu vilkår givet ved afgørelsen den 4. marts 2022.

Afgørelsen er truffet i henhold til lov nr. 1338 af 1. september 2020 om videnskabetisk behandling af sundhedsvidenskabelige forskningsprojekter (komiteloven).

Godkendelsen gælder for de anmeldte forsøgssteder, de anmeldte forsøgsansvarlige i Danmark samt for den angivne forsøgsperiode. Komitéen forventer, at den forsøgsansvarlige sørger for at underrette de øvrige deltagere i projektet om Komitéens afgørelse.

Lægemedelstyrelsen orienteres om afgørelsen.

Det er en betingelse for projektets iværksættelse, at Lægemedelstyrelsen også godkender forsøget.

Vær opmærksom på at godkendelsesperioden i Lægemedelstyrelsens afgørelse kan være en anden end i denne afgørelse. Det er forsøgsansvarliges ansvar at sikre – evt. ved en ansøgning om forlængelse – at der er hele tiden under projektets forløb er fornøden godkendelse fra de to myndigheder.

Komitéen gav samtidig dispensation fra kravet om informeret samtykke for en gruppe af forsøgspersoner, som beskrevet i bilag jf. komitélovens §10, stk. 1.

Godkendelsen gælder fra 28. april 2022 til den 31. marts 2025.

Godkendelsen omfatter følgende dokumenter:

- |                                                      |                   |                    |
|------------------------------------------------------|-------------------|--------------------|
| • Forsøgsprotokol                                    | version Final 2.0 | 4. december 2021   |
| • Protokoltillæg (dansk)                             | version vers. 2.0 | 13. april 2022     |
| • Deltagerinfo. og samtykkeerklæring voksne v. 3.0   |                   | 13. april 2022     |
| • Deltagerinfo. og samtykkeerklæring 15-17 år v. 3.0 |                   | 13. april 2022     |
| • Deltagerinfo. og samtykkeerklæring forældre v. 3.0 |                   | 13. april 2022     |
| • Spørgeskema: LIP Evaluation Questions vers. 2.0    |                   | 14. januar 2022    |
| • Spørgeskema: ede-q v. 6.0                          |                   | 15. september 2021 |
| • Spørgeskema: SCOFF og BEDS Screening v. 2.0        |                   | 30. september 2021 |
| • Spørgeskema: Procedurer v 1.0                      |                   | 28. juli 2021      |
| • Spørgeskema: SF 36 v. 2.0 standard og interview    |                   | 23. april 2019     |

- Spørgeskema: PCOSQ (livskvalitet) v. 2.0 23. april 2019
- Patient dagbog final v. 1.0 29. september 2021
- Patient Engagement flyer final- v. 1.0 1. juli 2021
- SPIOMET4HEALTH Webpage v. 2.0 8. oktober 2021

Følgende dokumenter er taget til efterretning i forbindelse med behandlingen af projektet:

- Forældrefuldmagt, modtaget 23. marts 2022
- Investigator's Brochure v. 4.0 1. september 2021
- Brochure Lifestyle Intervention v. 2.0 5. november 2021
- Dagbog beskrivelse final v. 1.0 29. september 2021
- Instruks til spytprøver (flyer) final v. 1.0 25. august 2021
- Spiomet4health\_Storyboard v. 1.0 12. august 2021
- Patient nødkort v. 1.0 27. juli 2021

Iværksættelse af projektet i strid med komitéens godkendelse kan straffes med bøde eller fængsel, jf. komitélovens §§41 og 42.

### Bemærkninger

Det bemærkes, at komiteen ikke er ressortmyndighed vedr. regelsættet om databeskyttelse, og at komiteen forudsætter, at projektet gennemføres i overensstemmelse med Europa-Parlamentets og Rådets forordning nr. 2016/679 af 27. april 2016 om beskyttelse af fysiske personer i forbindelse med behandling af personoplysninger og om fri udveksling af sådanne oplysninger og databeskyttelsesloven.

### Forskers pligter

Som forsøgsansvarlig skal du være opmærksom på følgende forpligtelser i forhold til komitésystemet:

#### Ændringer

Hvis den forsøgsansvarlige foretager væsentlige ændringer under projektets gennemførelse, skal ændringerne anmeldes til komitéen i form af tillægsprotokoller. Først når komitéens godkendelse af ændringerne er modtaget, må disse iværksættes, jf. komitélovens §27, stk. 1.

Forsøgsansvarlig skal anmelde tillægsprotokoller elektronisk på [www.drvc.dk](http://www.drvc.dk). Ved anmeldelsen skal det oprindeligt tildelte anmeldelsesnummer og adgangskode anvendes.

Se vejledning om ændringer af et godkendt forskningsprojekt:

<http://www.nvk.dk/forsker/forskervejledning/vejledning-om-aendringer-i-et-godkendt-projekt>

#### Løbende indberetning af bivirkninger og hændelser

Forsøgsansvarlig skal omgående indberette til komitéen, hvis der under projektet optræder formodet alvorlige, uventede bivirkninger (SUSARs), jf. komitélovens §30, stk. 1. Indberetningen skal ledsages af kommentarer om eventuelle konsekvenser for forsøget. Pligten til indberetning omfatter kun SUSARs, der er forekommet i Danmark og skal ske senest syv dage efter, at sponsor eller den forsøgsansvarlige har fået kendskab til tilfældet.

Indberetning af SUSARs til komitésystemet skal indholdsmæssigt følge Lægemiddelstyrelsens vejledning om kliniske forsøg, afsnit 12.1 og 12.3 om indberetning af bivirkninger.

#### Årlig statusindberetning

En gang årligt i hele forsøgsperioden skal forsøgsansvarlig sende en årlig indberetning til komitéen. Indberetningen skal indeholde en liste over alle formodet alvorlige (ventede og uventede) bivirkninger, som er indtruffet i forsøgsperioden (ASR/DSUR) sammen med en rapport om forsøgspersonernes sikkerhed, jf. komitélovens §30, stk. 2. Materialet skal være på dansk eller engelsk.

Indberetninger af ASR/DSUR skal i øvrigt følge Lægemiddelstyrelsens vejledning om kliniske forsøg, afsnit 12.4 om indberetning af bivirkning.

Ovenstående indberetninger kan ske ved hjælp af skemaer, der findes på <http://www.nvk.dk/emner/bivirkninger/hvornaar-skal-bivirkninger-indberettes>  
Skemaet med bilag skal mailes til [komite@rsyd.dk](mailto:komite@rsyd.dk).

#### Underretning om afslutning

Den forsøgsansvarlige skal senest 90 dage efter datoen for godkendelsens udløb underrette komitéen herom, jf. komitélovens §31, stk. 1.

Afbryder forsøgsansvarlig sit projekt tidligere end planlagt, skal en begrundelse herfor sendes til komitéen senest 15 dage efter, at beslutningen er truffet, jf. komitélovens §31, stk. 2.

Hvis forsøgsansvarlig ikke påbegynder sit projekt, skal dette samt årsagen hertil meddeles komiteen.

Underretningen kan ske ved hjælp af et skema, der findes på <http://www.nvk.dk/forsker/indberetning-ved-afslutning-af-forsog>  
Skemaet med bilag skal mailes til [komite@rsyd.dk](mailto:komite@rsyd.dk).

Vi skal bede forsøgsansvarlige om altid at anføre **projekt id S-20220006**, ved fremsendelse af projektmaterialer til komitéen. Henvendelser vedrørende dit projekt kan rettes til komitéens sekretariat på [komite@rsyd.dk](mailto:komite@rsyd.dk).

#### **Tilsyn:**

Det er Lægemiddelstyrelsen, der fører tilsyn med lægemiddelforsøg.

**Sagen har været behandlet og er endelig godkendt af komitéens sekretariat i samarbejde med**

- Aia Elise Jønch, Overlæge, phd

På Komiteens vegne  
venlig hilsen



Aia Elise Jønch, Overlæge, phd

Kopi til:

MajBritt Jørgensen [MajBritt.jorgensen@linkmedical.eu](mailto:MajBritt.jorgensen@linkmedical.eu)

Lægemiddelstyrelsen på [kf@dkma.dk](mailto:kf@dkma.dk)

## CERTIFICATION OF TRANSLATION

**Quote number:** 2205-00396

**Source document:** 221799-22 EndeligGodkendelse S-20220006.pdf

**Full Title of Documents:** 221799-22 EndeligGodkendelse S-20220006\_EN\_translated  
13May2022.docx

**Footer:** 221799-22 EndeligGodkendelse S-20220006, translated into English on 13May2022

**Original Source Language of Document:** Danish  
**Language Document is to be Translated into:** English

### Declaration of Translator:

I, Jan Hirš on behalf of Skrivanek s. r. o., hereby certify that the translation into English agrees with the text of the original document in Danish language, that there were no changes/corrections made to the original document neither the translation, and that it was translated by a certified translator fluent in both above mentioned languages.

I, Jan Hirš on behalf of Skrivanek s. r. o., also confirm that the above mentioned service has been rendered and that the translated document is to the best of my knowledge a true and faithful translation of the original document as provided by the client

With Best regards,



Pernille Ravn  
Odense University Hospital  
Gynækologisk Obstetrisk Afdeling D  
Klørvænget 23, Indgang 55, 2. sal,  
5000 Odense C

Date: 28 April 2022  
Project ID: **S-20220006**  
Case no. 22/6638.  
Heidi Lund Olesen /  
Betina Simonsen

**Research project: A randomized, multi-center, multinational Phase II clinical trial to evaluate the efficacy, tolerance and safety of a fixed dose combination of spironolactone, pioglitazone and metformin (SPIOMET) in young girls and young adult women (AYA) with polycystic ovary syndrome (PCOS).**

The Scientific Ethics Committee 2 for the Southern Denmark Region has reached a conclusion on **approving your project**. On 13 April 2022, the Committee received revised material. The project materials now meet the conditions outlined in the 4 March 2022 decision.

The decision was made in accordance with Act No. 1338 of September 1, 2020, regarding the ethical treatment of health science research projects (the Committee Act).

The approval applies to the notified trial sites and trial leaders in Denmark, as well as the trial period specified. The Committee expects the individual responsible for the experiment to inform the other project participants of its decision.

The Danish Medicines Agency is informed of the decision.

The trial's approval by the Danish Medicines Agency is a prerequisite for the implementation of the project.

Please note that the approval period in the decision of the Danish Medicines Agency may differ from this decision. Throughout the duration of the project, it is the responsibility of the person in charge of the experiment to ensure - possibly in the case of a request for an extension - that there is always the necessary approval from both authorities.

At the same time, the committee exempted a group of subjects from the requirement for informed consent, as described in the appendix, cf. section 10 (1) of the Committee Act.

The approval is valid from 28 April 2022 to 31 March 2025.

The approval includes the following documents:

- Trial protocol version Final 2.0 December 4, 2021
- Protocol supplement (Danish) version verse. 2.0 April 13, 2022
- Participant info. and declaration of consent adults v. 3.0 April 13, 2022
- Participant info. and declaration of consent 15-17 years v. 3.0 April 13, 2022
- Participant info. and consent form parents v. 3.0 April 13, 2022
- Questionnaire: LIP Evaluation Questions verse. 2.0 14 January 2022
- Questionnaire: ede-q v. 6.0 15 September 2021
- Questionnaire: SCOFF and BEDS Screening v. 2.0 30 September 2021
- Questionnaire: Procedures v 1.0 July 28, 2021

- Questionnaire: SF 36 v. 2.0 standard and interview April 23, 2019
- Questionnaire: PCOSQ (quality of life) v. 2.0 23 April 2019
- Patient diary final v. 1.0 29 September 2021
- Patient Engagement flyer final- v. 1.0 01 July 2021
- SPIOMET4HEALTH Webpage v. 2.0 08 October 2021

The following documents have been noted in relation to the processing of the project:

- Parental power of attorney, received March 23, 2022
- Investigator's Brochure v. 4.0 01 September 2021
- Brochure Lifestyle Intervention v. 2.0 05 November 2021
- Diary description final v. 1.0 29 September 2021
- Instructions for saliva tests (flyer) final v. 1.0 25 August 2021
- Spiomet4health\_Storyboard v. 1.0 12 August 2021
- Patient emergency card v. 1.0 27 July 2021

In accordance with Sections 41 and 42 of the Committee Act, initiating the project without approval from the committee may result in a fine or imprisonment.

### Comments

It is noted that the committee is not a data protection authority and that the committee assumes the project is implemented in accordance with Regulation (EU) 2016/679 of the European Parliament and of the Council of 27 April 2016 on the protection of natural persons with regard to the processing of personal data and on the free movement of such data and with the Data Protection Act.

### Duties of researchers

As the experiment's responsible party, you must be aware of the following responsibilities regarding the committee system:

#### Changes

If the person in charge of the experiment makes significant changes during the project's execution, the committee must be notified in the form of additional protocols. The changes may be implemented only after receiving the committee's approval, as per Section 27 (1) of the Committee Act.

The person responsible for the experiment must notify additional protocols electronically at [www.drvk.dk](http://www.drvk.dk). When notifying, the originally assigned notification number and password must be used.

See guidance on changes to an approved research project:

<http://www.nvk.dk/forsker/forskervejledning/vejledning-om-aendringer-i-et-godkendt-projekt>

#### Continuous reporting of side effects and events

According to section 30 (1) of the Committee Act, the person in charge of the experiment must immediately notify the committee of any serious, unanticipated side effects (SUSARs) that occur during the project. The report must include commentary on any trial-related consequences. The obligation to report applies only to SUSARs that have occurred in Denmark and must be fulfilled within seven days of the sponsor or person responsible for the trial becoming aware of the incident.

In terms of content, the reporting of SUSARs to the committee system must adhere to the Danish Medicines Agency's clinical trial guidelines, sections 12.1 and 12.3 on reporting side effects.



#### Annual status report

Throughout the entire trial period, the individual in charge of the trial must submit an annual report to the committee. The report must include a list of all presumed serious (expected and unexpected) adverse events that occurred during the trial period (ASR / DSUR) as well as a report on the subjects' safety, per Section 30 (2) of the Committee Act. The material must be in Danish or English.

Reports of ASR / DSUR must otherwise adhere to the Danish Medicines Agency's clinical trial reporting guidelines, as per section 12.4 on adverse reactions.

The above reports can be made using forms available at <http://www.nvk.dk/emner/bivirkninger/hvornaar-skalbivirkninger-indberettes>

The form with appendices must be emailed to [komite@rsyd.dk](mailto:komite@rsyd.dk).

#### Completion notification

The individual responsible for the experiment must notify the committee within ninety days of the expiration date of the approval, as per Section 31 (1) of the Committee Act.

Section 31 (2) of the Committee Act stipulates that a justification must be sent to the committee no later than 15 days after a decision has been made if the person responsible for the experiment interrupts his project earlier than planned.

If the person responsible for the experiment does not start his project, this and the reason for this must be notified to the committee.

The notification can be made using a form available at <http://www.nvk.dk/forsker/indberetning-ved-afslutning-af-forsog>

The form with appendices must be emailed to [komite@rsyd.dk](mailto:komite@rsyd.dk).

We must ask the person responsible for the experiment to always state **project id S-20220006**, when sending project materials to the committee. Inquiries regarding your project can be directed to the committee's secretariat at [komite@rsyd.dk](mailto:komite@rsyd.dk).

#### **Oversight:**

The Danish Medicines Agency supervises drug trials.

#### **The case has been considered and has finally been approved by the committee's secretariat in collaboration with**

- Aia Elise Jønch, Overlæge, phd

Yours sincerely, on behalf of the Committee



Aia Elise Jønch, Overlæge, phd

Copy to:

MajBritt Jørgensen [MajBritt.jorgensen@linkmedical.eu](mailto:MajBritt.jorgensen@linkmedical.eu)

**-The Scientific Ethics  
Committees for the  
Southern Denmark Region**

[komite@rsyd.dk](mailto:komite@rsyd.dk)

The Danish Medicines Agency at [kf@dkma.dk](mailto:kf@dkma.dk)

221799-22 Endelig Godkendelse S-20220006, translated into English on 13 May 2022

|                |                       |                 |                  |                       |
|----------------|-----------------------|-----------------|------------------|-----------------------|
| <b>Region:</b> | <b>Saksbehandler:</b> | <b>Telefon:</b> | <b>Vår dato:</b> | <b>Vår referanse:</b> |
| REK midt       | Linda Tømmerdal Roten | 73597506        | 23.06.2022       | 423718                |

Eszter Vanky

**Prosjektsøknad:** En randomisert, multinasjonal, fase II-multisenterstudie for å evaluere effekt, toleranse og sikkerhet for en fast kombinasjon av spironolakton, pioglitazon og metformin (SPIOMET) hos tenåringer og unge voksne kvinner med polycystisk ovariesyndrom (PCOS).

**Søknadsnummer:** 423718

**EudraCT-nummer:** 2021-003177-58

**Forskningsansvarlig institusjon:** Norges teknisk-naturvitenskapelige universitet

## Prosjektsøknad godkjennes med vilkår

### Søkers beskrivelse

*Det finnes foreløpig ingen godkjent behandling for polycystisk ovariesyndrom (PCOS), den vanligste endokrine forstyrrelsen hos fertile kvinner. Sykdommen rammer 5-10% kvinner på verdensbasis. Formålet med denne studien er å evaluere effekt og sikkerhet av metformin, pioglitazon og spironolakton (SPIOMET) i kombinasjon hos jenter og unge kvinner i alderen 12-25 år med PCOS. Pasientene randomiseres 1:1:1:1 til studiens 4 behandlingsarmer; pioglitazon (PIO), kombinasjon pioglitazon og spironolakton (PIO), kombinasjon pioglitazon, spironolakton og metformin (SPIOMET), samt placebo. Pasientene mottar behandling i 12 måneder og følges opp i ytterligere 6 måneder. Totalt skal det rekrutteres 364 pasienter i studien, hvorav 41 i Norge*

### Innledning

Viviser til din søknad om forhåndsgodkjenning av ovennevnte forskningsprosjekt. Søknaden og tilbakemeldingen din ble behandlet av Regional komité for medisinsk og helsefaglig forskningsetikk Midt-Norge (REK midt) i møte 02.06.2022. Vurderingen er gjort med hjemmel i helseforskningsloven § 10.

### Saksgang

Søknaden ble første gang behandlet i REK midts møte 16.02.2022. Endelig vedtak ble utsatt fordi det var uklare knyttet til deltakernes risiko. Komiteen besluttet å innhente en sakkyndig uttalelse til støtte i den videre vurderingen av forsvarligheten av prosjektet. Prosjektleder ble bedt om en tilbakemelding på om det er nødvendig å inkludere mindreårige i prosjektet, om en betenkning rundt det å gi livsstilsråd til mindreårige og om spørreskjemaer og informasjonsmaterieell bør tilpasses de yngste i utvalget. Videre har vi

bedt prosjektleder klargjøre om det skal opprettes en spesifikk forskningsbiobank i Norge og om sponsor skal kunne bruke data til å besvare fremtidige forskningsspørsmål utover de som er beskrevet i søknaden. Vi mottok sakkyndiguttalelser 20.05.2022 og 24.05.2022, og tilbakemeldingen fra prosjektleder 20.05.2022. Et spørreskjema (SCOFF /BEDS v2) med spørsmål for å avdekke spiseforstørrelser ble ettersendt 20.05.2022, men dette kom ikke med på komitémøtet.

## **REKs vurdering**

### *Komiteens opprinnelige prosjektsammendrag*

Polycystisk ovariesyndrom (PCOS) er den vanligste endokrine forstyrrelsen hos fertile kvinner. Formålet med denne internasjonale fase II multisenter randomiserte legemiddelstudien er å undersøke hvordan metformin, pioglitazon og spironolakton i kombinasjon (SPIOMET) påvirker egggløsningsrate hos jenter og unge kvinner i alderen 12-25 år med PCOS, og evaluere effekt, toleranse og sikkerhet av behandlingen. Det er fire studiearmene: 1: placebo, 2: pioglitazone, 3: kombinasjon av pioglitazone og spironolakton, og 4: kombinasjon av pioglitazone, spironolakton og metformin. Totalt skal man rekruttere 364 pasienter, hvorav 41 fra St. Olavs Hospital, Norge. Deltakerne blir randomisert til en av de fire studiearmene. Deltakelse innebærer å motta behandling i 12 måneder, kliniske undersøkelser som røntgen for å undersøke kroppssammensetning (DXA), MR for å måle andelen fett i organer (innvoller), under huden samt i lever, ultralyd av halspulsåre og måling av høyde, vekt og blodtrykk. Det vil også bli tatt blodprøver, spyttprøver for å måle progesteron og urinprøver for graviditetstest. Biologisk materiale som ikke analyseres kort tid etter prøvetaking skal lagres i en spesifikk forskningsbiobank. Opplysninger om medisinsk historie og medisinerbruk vil bli hentet fra pasientjournal, og deltakerne skal fylle ut spørreskjema og menstruasjonsdagbok. Studien er samtykkebasert. EudraCT-nummer 2021-003177-58.

### *Oppsummering av tilbakemeldingen*

I tilbakemeldingen har du kommentert komiteens punkter. Du presiserer at det er nødvendig å inkludere mindreårige i studien, da det er jenter under 19 år som har minst behandlingstilbud. Du har imidlertid oppgitt at det er uaktuelt å inkludere jenter under 14 år i studien. All livsstilscoaching vil bli individuelt tilpasset den enkelte deltaker. Spørreskjema om spiseforstyrrelser (EDE-Q) vil kun bli benyttet dersom studiesykepleier får bekreftet at det er risiko for spiseforstyrrelser via skjemaet «SCOFF+BEDS». Du opplyser om at det ikke skal opprettes noen forskningsbiobank i Norge. Alt biologisk materiale vil bli overført til Spania, og deltakerne blir gitt mulighet til å velge om de ønsker å donere materiale til lagring i Spania for fremtidig forskning på PCOS.

### *Oppsummering av sakkyndiges vurdering*

Begge de sakkyndige vurderer at studien er medisinsk forsvarlig å gjennomføre, gitt en bedre plan for å håndtere spiseforstyrrelser og med endringer i informasjonsmateriellet. En

av de sakkyndige mener sikkerheten rundt prevensjon og tidlig påvisning av svangerskap må være bedre. Videre er en av de sakkyndige skeptisk til inklusjon av jenter ned i 12-års alder, og mener det ikke er nødvendig for å besvare forskningsspørsmålene.

### ***Komiteens forsvarlighetsvurdering***

Vi ber deg utarbeide en plan for å håndtere spiseforstyrrelser, og ber om endringer i kost/livsstilskjemaet, skjemaet med tittel «Din helse og trivsel» og informasjonsskriv. Vi har også en kommentar til lagring av humant biologisk materiale i utlandet. Du må også oppdatere forskningsprotokollen. Forutsatt at du endrer informasjonsskriv i samsvar med våre kommentarer vil deltakerne og de foresatte motta informasjon som gir dem et godt grunnlag for et informert, frivillig og dokumenterbart samtykke. Vi gjør oppmerksom på at samtykker som blir avgitt på grunnlag av informasjonsskrivene ikke er dekkende for å utføre genetiske undersøkelser. Vi vurderer atrisiko/ulempen forbundet med deltakelse er minimal og akseptabel gitt den potensielle nytten av prosjektet. Prosjektet er også organisert med en klar ansvarsfordeling, og med relevant og tilstrekkelig kompetanse i prosjektgruppen. Under forutsetning av at vilkårene nedenfor tas til følge vurderer vi at prosjektet er forsvarlig, og at hensynet til deltakernes velferd og integritet er ivarett.

### ***Godkjenner opprettelse av spesifikk forskningsbiobank***

Det skal opprettes en spesifikk forskningsbiobank bestående av blodprøver (fullblod, serum og plasma), urin og spyttprøver fra inntil 30 personer. Du, som prosjektleder, er ansvarshavende for forskningsbiobanken. Vi godkjenner opprettelsen av en spesifikk forskningsbiobank jf. helseforskningsloven § 25, annet ledd. Du har i søknadsskjemaets punkt 5.15 oppgitt at dere ønsker å oppbevare biologisk materiale utover sluttdato for prosjektet. Vi ønsker å presisere at det ikke er anledning til å oppbevare biologisk materiale som lagres i en norsk prosjektspesifikk forskningsbiobank utover prosjektperioden. Vi setter en tidsavgrensning på forskningsbiobanken i tråd med sluttdatoen for prosjektet, til og med 30.08.2025. Du er ansvarlig for at materialet destrueres senest ved sluttdato.

### ***Lagring av biologisk materiale i utlandet***

Du har opplyst om at biologisk materiale skal overføres til Spania for lagring i forskningsbiobank for fremtidig forskning på PCOS (generell forskningsbiobank) dersom deltaker/foresatte samtykker til det. Vi gjør oppmerksom på at norsk REK ikke har myndighet til å godkjenne opprettelse av generell forskningsbiobank i utlandet, eller stille vilkår knyttet til hvor lenge materialet skal lagres i utlandet. Vanligvis lagres biologisk materiale permanent i en generell forskningsbiobank. REK skal imidlertid påse kravene til samtykke er oppfylt og at deltakerne får god og tilstrekkelig informasjon. Vi vurderer at kravene i dette tilfellet er oppfylt, jamfør helseforskningsloven § 29. Vi godkjenner derfor overføringen av humant biologisk materiale til Spania.

### ***Plan for å håndtere spiseforstyrrelser***

Vi ber om at du utarbeider en beredskapsplan for å håndtere spiseforstyrrelser som blir avdekket. Vi ber deg også om å involvere en ernæringsfysiolog til å gå igjennom informasjonsmateriellet for å se om det er formuleringer som kan stimulere til spiseforstyrrelser.

### *Endring av spørreskjema*

Du må endre kost/livsstilskjemaet ved å bytte ut ordene «lidelse» med «tilstand» og «fertilitet» med «fruktbarhet». Du må endre skjemaet med tittel «Din helse og trivsel» ved å endre setningen «For hvert av de følgende spørsmålene vennligst sett et x i den ene luken som best beskriver ditt svar.» ved å bytte ut ordet «luken» med for eksempel «avkryssingsboks».

### *Endring av informasjonsskriv*

Vi ber deg om å utforme et kort og forenklet informasjonsskriv tilpasset barn der du unngår fagterminologi, samt ord og begreper som ikke nødvendigvis er enkle å forstå for barn og ungdom (for eksempel produksjon, effekt, relatert). Videre ber vi deg om å endre informasjonsskriv i samsvar med følgende punkter:

1. Oppdater informasjonsskriv til samtykkekompetente ved å ta utgangspunkt i REKs mal for informasjonsskriv til voksne».
2. Det må komme klart frem at NTNU og St. Olavs Hospital er ansvarlig for studien i Norge.
3. Informer nærmere om prevensjon og graviditetstesting på en måte som ikke forutsetter at alle er seksuelt aktive. Du kan for eksempel informere om at dersom man er seksuelt aktiv så vil det være aktuelt med graviditetstesting på grunn av legemidlene.
4. Beskriv livsstilsintervensjonen bedre, og gjerne i samråd med en ernæringsfysiolog.
5. I skrevet til foresatte må du endre setningen «Dette er et spørsmål til din datter om å delta i et forskningsprosjekt for å undersøke...» til «Dette er et spørsmål til deg om du vil la din datter delta i et forskningsprosjekt for å undersøke...».
6. Unngå fagterminologi. Bytt ut «hirsutisme» med «økt hårvekst».
7. Bytt ut «dårlig kolesterol» med «ugunstig kolesterol».
8. Du må klargjøre at lagring i en generell forskningsbiobank innebærer permanent lagring av materialet. Du må også omformulere setningen «Opplysningene og prøvene av deg vil bli slettet 15 år etter at sluttrapport etter studien foreligger.» ved å presisere at slettingen kun gjelder i denne konkrete studien.
9. Endre setningen «Etter ny personopplysningslov har Fundació Sant Joan de Déu (FSJD) behandlingsansvar for dine personopplysninger og prosjektleder Eszter Ilona Vanky et selvstendig ansvar for å sikre at behandlingen av dine opplysninger har et lovlig grunnlag.» til «NTNU, St. Olavs Hospital og prosjektleder Eszter Ilona Vanky er ansvarlig for personvernet i prosjektet.».
10. Bytt ut setningen «Vi behandler opplysningene basert på og i samsvar med artikkel 6 til 9 i EUs generelle personvernforordning.» med «Vi behandler opplysningene basert på samtykke.».
11. Vennligst oppdater versjonsnummer og/eller datering i skrivene.

## Vilkår for godkjenning

1. Du må sende oss reviderte informasjonsskriv og forenklet skriv til barn, kost/livsstilskjema, skjemaet med tittelen «Din helse og trivsel» og beredskapsplanen via REK-portalen. Vennligst benytt funksjonen «Endring og/eller henvendelse». Du kan ikke sette i gang prosjektet før vi har bekreftet at informasjonsskrivene er godkjent.
2. Du må registrere St. Olavs Hospital HF hvor pasientene rekrutteres fra som forskningsansvarlig institusjon i tillegg til NTNU. Vennligst benytt funksjonen «Endring og/eller henvendelse».
3. Komiteen forutsetter at kun jenter over 14 år inkluderes i studien.
4. Du kan kun bruke materialet i biobanken i dette konkrete prosjektet. Annen bruk vil kreve søknad til oss, og vil normalt sett kreve innhenting av nytt samtykke.
5. Materiale i forskningsbiobanker skal oppbevares og behandles forsvarlig. Oppbevaring og behandling skal skje med respekt for giveren av materialet, jf. helseforskningsloven § 27.
6. Komiteen minner om at koblingsnøkkel skal bli værende i Norge ved internasjonalt samarbeid. Dette gjelder også ved lagring av biologisk materiale i utlandet.
7. Komiteen forutsetter godkjenning fra Legemiddelverket (SLV) dersom dette er nødvendig. Du er selv ansvarlig for å avklare dette med SLV.
8. Komiteen minner om at de aller fleste kliniske studier skal registreres i det offentlige tilgjengelige registeret [www.clinicaltrials.gov](http://www.clinicaltrials.gov). Du er selv ansvarlig for å avklare om forskningsstudien er omfattet av kravet til registrering.
9. Komiteen forutsetter at ingen personidentifiserbare opplysninger kan fremkomme ved publisering eller annen offentliggjøring.
10. Komiteen forutsetter at du og alle prosjektmedarbeiderne følger egen institusjons bestemmelser for å ivareta informasjonssikkerhet og personvern ved innsamling, bruk, oppbevaring, deling og utlevering av personopplysninger. Bestemmelsene må være i samsvar med komiteens vilkår for godkjenning.
11. Av dokumentasjonshensyn skal opplysningene oppbevares i 15 år etter prosjektslutt. Enhver tilgang til prosjektdataene skal da være knyttet til behovet for etterkontroll. Prosjektdata vil således ikke være tilgjengelig for prosjektet. Prosjektleder og forskningsansvarlig institusjon er ansvarlige for at opplysningene oppbevares indirekte personidentifiserbart i denne perioden, det vil si atskilt i en koblingsnøkkel og en datafil. Etter denne 15-årsperioden skal opplysningene slettes eller anonymiseres. Komiteen gjør oppmerksom på at anonymisering er mer omfattende enn å kun slette koblingsnøkkel, jf. Datatilsynets veileder om anonymiseringsteknikker.

## Vedtak

Godkjent på vilkår

## Sluttmelding

Prosjektleder skal sende sluttmelding til REK på eget skjema via REK-portalen senest 6 måneder etter sluttdato 30.08.2025, jf. helseforskningsloven § 12. Dersom prosjektet ikke starter opp eller gjennomføres meldes dette også via skjemaet for sluttmelding.

**Søknad om endring**

Dersom man ønsker å foreta vesentlige endringer i formål, metode, tidsløp eller organisering må prosjektleder sende søknad om endring via portalen på eget skjema til REK, jf. helseforskningsloven § 11.

**Klageadgang**

Du kan klage på REKs vedtak, jf. forvaltningsloven § 28 flg. Klagen sendes på eget skjema via REK portalen. Klagefristen er tre uker fra du mottar dette brevet. Dersom REK opprettholder vedtaket, sender REK klagen videre til Den nasjonale forskningsetiske komité for medisin og helsefag (NEM) for endelig vurdering, jf. forskningsetikkloven § 10 og helseforskningsloven § 10.

Med vennlig hilsen

Vibeke Videm

Professor, dr.med./ overlege

Leder, REK midt

Linda Tømmerdal Roten

Seniorrådgiver, REK midt

*Kopi til:*

Norges teknisk-naturvitenskapelige universitet  
Inger Hilde Zahl  
Statens legemiddelverk



|                |                       |                 |                  |                       |
|----------------|-----------------------|-----------------|------------------|-----------------------|
| <b>Region:</b> | <b>Saksbehandler:</b> | <b>Telefon:</b> | <b>Vår dato:</b> | <b>Vår referanse:</b> |
| REK midt       | Linda Tømmerdal Roten | 73597506        | 16.08.2022       | 423718                |

Eszter Vanky

**423718 En randomisert, multinasjonalt, fase II-multisenterstudie for å evaluere effekt, toleranse og sikkerhet for en fast kombinasjon av spironolakton, pioglitazon og metformin (SPIOMET) hos tenåringer og unge voksne kvinner med polycystisk ovariesyndrom (PCOS).**

**Forskningsansvarlig:** Norges teknisk-naturvitenskapelige universitet

**Søker:** Eszter Vanky

### **REKs svar på generell henvendelse**

Hei Eszter.

Vi mottok 04.08.2022 din henvendelse der forenklet informasjonsskriv til barn under 12 år, reviderte informasjonsskriv (versjon 1.2 datert 05.07.2022), endret kost/livsstils-skjema, spørreskjemaet SCOFF og en beredskapsplan for å håndtere spiseforstyrrelser var vedlagt. Du har endret informasjonsskrivene i samsvar med våre kommentarer. Vi anser derfor vilkår 1 i vedtaksbrev fra REK midt datert 23.06.2022 som oppfylt og tar skrivingene til orientering. Videre tar vi endrede spørreskjema og beredskapsplanen til orientering. St. Olavs Hospital HF er nå registrert som forskningsansvarlig institusjon i tillegg til NTNU.

Lykke til med prosjektet.

Vennlig hilsen  
Linda Tømmerdal Roten  
Seniorrådgiver, REK midt

Vennlig hilsen  
Regionale komiteer for medisinsk og helsefaglig forskningsetikk

*Denne e-posten er sendt automatisk fra REK og kan ikke besvares*

## CERTIFICATION OF TRANSLATION

**Quote number:** 2207-01360

**Source document:** REK\_23JUN2022 Prosjektsøknad godkjennes med vilkår.pdf

**Full Title of Documents:** SPIOMET4HEALTH, NOR conditional approval, 23Jun2022

**Footer:** SPIOMET4HEALTH, NOR conditional approval, 23Jun2022

**Original Source Language of Document:** Norwegian  
**Language Document is to be Translated into:** English

### Declaration of Translator:

I, Jan Hirš on behalf of Skrivanek s. r. o., hereby certify that the translation into English agrees with the text of the original document in Norwegian language, that there were no changes/corrections made to the original document neither the translation, and that it was translated by a certified translator fluent in both above mentioned languages.

I, Jan Hirš on behalf of Skrivanek s. r. o., also confirm that the above mentioned service has been rendered and that the translated document is to the best of my knowledge a true and faithful translation of the original document as provided by the client

With Best regards,

**Jan Hirš**  
Head of IPMC and Localization Department

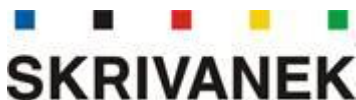

Skřivánek s.r.o.  
Veveří 102  
CZ 616 00 Brno  
[jan.hirs@skrivanek.com](mailto:jan.hirs@skrivanek.com), [www.skrivanek.com](http://www.skrivanek.com)  
Tel.: +420 546 210 973 Fax: +420 546 210 738  
GSM: +420 739 391 791

|                |                       |               |                  |                       |
|----------------|-----------------------|---------------|------------------|-----------------------|
| <b>Region:</b> | <b>Case Officer:</b>  | <b>Phone:</b> | <b>Our date:</b> | <b>Our reference:</b> |
| REC Central    | Linda Tømmerdal Roten | +47 73597506  | 23/06/2022       | 423718                |

Eszter Vanky

**Project application:** A randomised, multinational, Phase II multicentre study to evaluate the efficacy, tolerance and safety of a fixed combination of spironolactone, pioglitazone and metformin (SPIOMET) in adolescent and young adult women with polycystic ovary syndrome (PCOS).

**Application number:** 423718

**EudraCT Number:** 2021-003177-58

**Institution responsible for research:** The Norwegian University of Science and Technology (NTNU)

## Project application is approved with conditions

### Applicant's description

*There is currently no approved treatment for polycystic ovary syndrome (PCOS), the most common endocrine disorder among fertile women. The disease affects 5-10% of women worldwide. The purpose of this study is to assess the efficacy and safety of metformin, pioglitazone, and spironolactone (SPIOMET) when used in combination, in girls and young women aged 12-25 years with PCOS. Patients are randomised 1:1:1:1 to the study's 4 treatment arms; pioglitazone (PIO), combination of pioglitazone and spironolactone (SPIO), combination of pioglitazone, spironolactone and metformin (SPIOMET), as well as a placebo. Patients are treated for 12 months and then monitored for an additional 6 months. The study will enrol 364 patients, 41 of whom will be from Norway.*

### Introduction

We refer to your application for the above research project's prior approval. The Regional Committee for Medical and Health Research Ethics in Central Norway (REC Central) considered the application and comments at its meeting on 2 June 2022. The evaluation was conducted in accordance with Section 10 of the Health Research Act.

### Proceedings

The application was initially discussed at the REC meeting on 16 February 2022. The final decision was postponed due to ambiguities regarding the risk of the participants. The Committee decided to solicit an expert opinion in support of the project's continued evaluation. The project manager was requested to comment on the necessity of including

minors in the project, a report on providing lifestyle advice to minors, and whether questionnaires and informational materials should be tailored to the youngest participant in the sample. In addition, we have requested clarification from the project manager as to whether a specific research biobank is to be established in Norway and whether the sponsor will be able to use data to answer future research questions beyond those outlined in the application. We obtained expert opinions on 20 May 2022 and 24 May 2022, and project manager feedback on 20 May 2022. On 20 May 2022, a questionnaire (SCOFF / BEDS v2) containing questions to identify eating enlargements was sent, but it was not discussed at the committee meeting.

## **REC's assessment**

### *The Committee's original project summary*

Polycystic ovary syndrome (PCOS) is the most common endocrine disorder among fertile women. The purpose of this international Phase II multicentre randomised pharmaceuticals study is to investigate how metformin, pioglitazone and spironolactone in combination (SPIOMET) affect the ovulation rate in girls and young women aged 12-25 years with PCOS, and to evaluate the efficacy, tolerance and safety of the treatment. There are four study arms: 1: placebo, 2: pioglitazone, 3: combination of pioglitazone and spironolactone, and 4: combination of pioglitazone, spironolactone and metformin. A total of 364 patients will be recruited, 41 of whom will come from Norway's St. Olav's Hospital. Participants are randomised into one of the four study arms. Participation in the study receive 12 months of treatment and clinical examinations such as X-rays to determine body composition (DXA), MRIs to determine the proportion of fat in organs (intestines), beneath the skin, and in the liver, carotid artery ultrasounds, and measurements of height, weight, and blood pressure. Additionally, blood samples, saliva samples for progesterone measurement, and urine samples for pregnancy testing will be taken. Biological samples that are not analysed immediately after collection must be stored in a designated research biobank. Information about medical history and medication use will be obtained from the patient record, and participants will complete a questionnaire and maintain a menstruation diary. The study is consent-based. EudraCT Number 2021-003177-58.

### *Summary of the feedback*

You have commented on the Committee's points in the feedback. You emphasise the importance of including minors in the study because girls under 19 have the fewest treatment options. You have stated, however, that it is irrelevant to include girls younger than 14 in the study. All lifestyle coaching will be personalised to the specific participant. Questionnaire on eating disorders (EDE-Q) will only be administered if the study nurse receives confirmation via "SCOFF + BEDS" that there is a risk of eating disorders. You state that there will be no research biobank established in Norway. All biological samples will be transferred to Spain, and participants will be given the option to donate samples for future PCOS research.

### *Summary of expert assessment*

Both experts believe it is medically justifiable to conduct the study, given a more effective treatment plan for eating disorders and revised informational materials. One of the experts believes that contraception and early pregnancy detection must be made safer. In addition, one of the experts is sceptical of the inclusion of girls under the age of 12 and believes their participation is unnecessary to answer the research questions.

### *The Committee's assessment of soundness*

We request that you prepare a plan for addressing eating disorders and request modifications to the diet/lifestyle form, the “Your health and well-being” form, and the information leaflet. Additionally, we have a comment regarding the overseas storage of human biological material. You are also obliged to update the research protocol. If you modify the information leaflet in accordance with our suggestions, the participants and their parents will receive information that provides a solid foundation for their informed, voluntary, and documentable consent. We would emphasise that consents based solely on the information leaflets are insufficient for genetic testing. In light of the project's potential benefits, we believe the risk/disadvantage associated with participation is minimal and acceptable. The project is also organised with a clear division of responsibilities and a project team with relevant and sufficient expertise. Assuming that the conditions are met, we believe that the project is justifiable and that the well-being and integrity of the participants will have been taken into account.

### *Approves the establishment of a particular research biobank*

Blood samples (whole blood, serum, and plasma), urine, and saliva samples will be collected from up to thirty individuals to establish a research biobank. As the project manager, you are in charge of the research biobank. We approve the establishment of a specific research biobank in accordance with Section 25 of the Health Research Act. You indicated in paragraph 5.15 of the application form that you intend to store biological material beyond the project's termination date. We wish to emphasise that it is not possible to store biological material in a project-specific biobank in Norway beyond the duration of the project. We established a time limit for the research biobank in accordance with the project's completion date of 30 August 2025. You are responsible for ensuring the material is destroyed by the expiration date.

### *Storage of biological material abroad*

You have stated that biological material will be transferred to Spain for storage in a research biobank for future PCOS research (general research biobank) subject to consent by the participant/guardian. We note that the Norwegian REC does not have the authority to approve the establishment of a biobank for general research abroad or to set conditions regarding the length of time the material may be stored abroad. Typically, biological material is stored permanently in a biobank for general research. However, the REC must ensure that the consent requirements are met and that participants receive sufficient and accurate information. We believe the requirements in this instance have been met in

accordance with Section 29 of the Health Research Act. The transfer of human biological material to Spain is therefore approved.

#### *Plan to address eating disorders*

We request that you develop a contingency plan to address any detected eating disorders. Involve a nutritionist in reviewing the informational materials to determine if any formulations can stimulate eating disorders.

#### *Amendments to the questionnaire*

You need to modify the diet/lifestyle questionnaire by replacing the words “disorder” with “condition” and “fertility” with “fruitfulness”. You need to modify the form entitled “Your health and well-being” by replacing the word “hatch” with “check box” in the sentence “For each of the following questions, please place an X in the box that best describes your answer.”

#### *Amendment of information letter*

We request that you create a brief and simplified letter of information tailored to children, avoiding technical terminology as well as words and concepts that are not necessarily simple for children and adolescents to comprehend (e.g., production, effect, related). In addition, we request that you modify the information sheet to reflect the following points:

1. Update consent-competent information letter using REC's template for adult information letter.
2. It must be clear that NTNU and St Olav's Hospital are responsible for the study in Norway.
3. Inform in greater detail about contraception and pregnancy testing without assuming that all individuals are sexually active. You can inform them, for instance, that if they are sexually active, pregnancy testing is necessary because of the effects of the drugs.
4. Improve the description of the lifestyle intervention, preferably in consultation with a nutritionist.
5. Change “This is a question for your daughter to participate in a research project to investigate...” to “This is an invitation for you if you would like your daughter to participate in a research project to investigate...” in the letter to parents.
6. Avoid technical terminology. Replace “hirsutism” with “increased hair growth”.
7. Replace “bad cholesterol” with “unfavourable cholesterol levels”.
8. You need to specify that storage in a biobank for general research involves long-term preservation of the material. You must also rephrase the sentence “Your information and tests will be deleted 15 years after the study's final report is published” to emphasise that the deletion only applies to this particular study.
9. Change the sentence “According to the new Personal Data Act, Fundació Sant Joan de Déu (FSJD) has processing responsibility for your personal data, and project

manager, Eszter Ilona Vanky has an independent responsibility to ensure that the processing of your data is legal” to “NTNU, St. Olav’s Hospital and project manager, Eszter Ilona Vanky is responsible for the privacy of the project.”

10. Replace “We process the information in accordance with and based on Articles 6 to 9 of the EU General Data Protection Regulation” with “We process the information based on consent.”
11. Please update version number and/or dating in the letters.

### **Conditions for approval**

1. Via the REC portal, you are required to send us the revised information letter and simplified letter for children, the diet/lifestyle form, the form entitled “Your health and well-being,” and the contingency plan. Please use the “Change and/or inquiry” function. You may not begin the project until we have approved the information letter.
2. You must register St. Olav’s Hospital HF from where the patients are recruited as the institution responsible for research in addition to NTNU. Please use the function “Change and/or inquiry”.
3. The Committee assumes that the study only includes women older than 14 years of age.
4. The material in the biobank may only be used for this specific project. Other uses will necessitate an application and, in most cases, a new consent.
5. Materials in biobanks must be properly stored and handled. In accordance with Section 27 of the Health Research Act, the donor of the material must be given due consideration with respect to its storage and processing.
6. Through international cooperation, the connection key will remain in Norway, according to the Committee. This also applies to storage of biological material abroad.
7. If necessary, the Committee requires approval from the Norwegian Medicines Agency (SLV). You are responsible for clarifying this with SLV.
8. The Committee reminds you that the vast majority of clinical trials should be registered in the publicly available register [www.clinicaltrials.gov](http://www.clinicaltrials.gov). You are responsible for clarifying whether the registration requirement applies to the research study.
9. The Committee assumes that no personally identifiable information can be obtained through publication or any other means.
10. The Committee assumes that you and all project staff adhere to the information security and privacy regulations of your own institution when collecting, using, storing, sharing, and disclosing personal information. The provisions must be in accordance with the co-committee’s terms for approval.
11. The information must be stored for 15 years after the completion of the project for documentation purposes. Any access to the project’s data must then be correlated with the need for subsequent action. As a result, project data will not be available. The project manager and the institution responsible for the research have responsibility for ensuring that the information is stored in a connection key and a data file during this time period. After 15 years, the information must be deleted or made anonymous. The Committee points out that anonymization is more comprehensive than simply deleting the connection key, cf. The Norwegian Data Protection Authority’s guide on anonymization techniques.

## **Decision**

Conditionally Approved

### **Notification of Completion**

The project manager is required to submit a notification of completion to the REC on a separate form via the REC portal no later than six months after the 30 August 2025 end date in accordance with Section 12 of the Health Research Act. If the project does not commence or is completed, this needs also to be communicated via the notification form.

### **Application for change**

If you wish to make significant changes to the purpose, method, time course, or organisation, the project manager must submit a separate form via the portal to the REC in accordance with Section 11 of the Health Research Act.

### **Right of appeal**

You may file an appeal against the REC's decision in accordance with Section 28 et seq of the Public Administration Act. The complaint is to be filed on a separate form via the REC portal. The deadline for filing complaints is three weeks after receiving this letter. If the REC upholds the decision, it forwards the complaint to the National Research Ethics Committee for Medicine and Health Sciences (NEM) for a final evaluation in accordance with Section 10 of the Research Ethics Act and Section 10 of the Health Research Act.

Best regards,

Vibeke Videm

Professor, Dr. Med./ Chief Physician

Director, REC Central

Linda Tømmerdal Roten

Senior Advisor, REC Central

*Copy to:*

The Norwegian University of Science and Technology (NTNU)

Inger Hilde Zahl

The Norwegian Medicines Agency



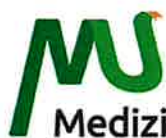

**VOTUM**  
gültig bis 12.05.2023

**EK-Nummer:** 34-169 ex 21/22      **EudraCT Nr.:** 2021-003177-58  
1608-2021

**Studientitel:** A Phase II, randomised, multi-centric, multi-national clinical trial to evaluate the efficacy, tolerability, and safety of a fixed dose combination of Spironolactone, Pioglitazone & Metformin (SPIOMET) for adolescent girls and young adult women (AYAs) with polycystic ovary syndrome (PCOS).

**Prüfer:** Professor Dr. med. Barbara Obermayer-Pietsch  
MU Graz, Universitätsklinik für Innere Medizin, Abt. Endokrinol. und Diabetologie

**Sponsor:** Fundació Sant Joan de Déu

**Ansprechpartner:** Prof. Lourdes Ibáñez, 08950 Esplugues de Llobregat, C/ Santa Rosa, 39-57, 4a planta

**CRO:** Optimapharm d.o.o.

**Ansprechpartner:** MPharm Vladimir Vujovic, 10000 Zagreb, Ulica grada Vukovara 284

**Antragsteller:** Optimapharm d.o.o.

**Ansprechpartner:** MPharm Vladimir Vujovic, 10000 Zagreb, Ulica grada Vukovara 284

Die o.a. Studie wurde von der Ethikkommission erstmals in der Sitzung 04-21/22 am 17.01.2022 behandelt.

Die Ethikkommission ist zu folgendem Schluss gekommen:

**Es besteht kein Einwand gegen die Durchführung der Studie in der vorliegenden Form.**

Stimmberechtigte bzw. anwesende Mitglieder bei der Behandlung waren: Siehe beiliegende Liste vom 17.01.2022.

Kommissionsmitglieder, die für diesen Tagesordnungspunkt als befangen anzusehen waren und daher gemäß Geschäftsordnung an der Entscheidungsfindung und Abstimmung nicht teilgenommen haben: keine

**Zur Beurteilung vorliegende Dokumente:**

**Dokumente eingegangen am 17.12.2021, begutachtet in der Sitzung 04-21/22 am 17.01.2022**

|                                                                                                                                                  |            |
|--------------------------------------------------------------------------------------------------------------------------------------------------|------------|
| ✓ Cover Letter 01 Anschreiben 1                                                                                                                  | 17.12.2021 |
| ✓ Antragsformular ECS                                                                                                                            | 17.12.2021 |
| Originalprotokoll 10 SPIOMET4HEALTH_clinical study protocol_final<br>2.0_04Dec2021_signature BOP Med Uni Graz 2                                  | 04.12.2021 |
| Originalprotokoll 08 SPIOMET4HEALTH_clinical study protocol_final<br>2.0_04Dec2021_clean 2                                                       | 04.12.2021 |
| Originalprotokoll 09 SPIOMET4HEALTH_Protocol Synopsis_final<br>V2.0_04Dec2021_DE_translated 15Dec2021 2                                          | 04.12.2021 |
| Informed Consent Form 15.2 SPIOMET4HEALTH_Webpage_V2.0_DE_translated<br>26Oct2021 2                                                              | 26.10.2021 |
| Informed Consent Form 13.1 SPIOMET4HEALTH_Austrian_PI for Adolescent<br>Participants from 12 to 14 Years_1.0_11Nov2021_DE_translated 07Dec2021 1 | 07.12.2021 |
| Informed Consent Form 14.3 SPIOMET4HEALTH_Brochure Lifestyle Intervention<br>V2.0_05Nov2021_DE_translated 07Dec2021 2                            | 07.12.2021 |

|                                                                                                                                                |            |
|------------------------------------------------------------------------------------------------------------------------------------------------|------------|
| Informed Consent Form 13.3 SPIOMET4HEALTH_Austria_ICF for Adult Participants_v1.0_11Nov2021_DE_translated 07Dec2021 1                          | 07.12.2021 |
| Informed Consent Form 14.10 Patient Engagement Task 5.4-flyer final-210701_MMM&Peggy_DE_translated 15Sep2021 1                                 | 15.09.2021 |
| Informed Consent Form 14.5 SPIOMET4HEALTH_Patient Diary Description_final V1.0_29Sep2021_DE_translated 26Oct2021 1                             | 26.10.2021 |
| Informed Consent Form 15.1 SPIOMET4HEALTH Recruitment Campaign Plan V1.0, 27Oct2021_DE_translated 07Dec2021 1                                  | 07.12.2021 |
| Informed Consent Form 14.4 Spiomet4health_Storyboard_V1_DE_translated 15Sep2021 1                                                              | 15.09.2021 |
| Informed Consent Form 13.4 SPIOMET4HEALTH_Austria_ICF for Parents_v1.0_11Nov2021_DE_translated 07Dec2021 1                                     | 07.12.2021 |
| Informed Consent Form 13.2 SPIOMET4HEALTH_Austria_ICF for Adolescent Participants from 14 to 17 years_v1.0_11Nov2021_DE_translated 07Dec2021 1 | 07.12.2021 |
| Informed Consent Form 14.7 SPIOMET4HEALTH_Material-Evaluation-Trial-participants_final_DE_translated 15Sep2021 1                               | 15.09.2021 |
| Informed Consent Form 14.8 SPIOMET4HEALTH_leaflet_DE_translated 15Sep2021 1                                                                    | 15.09.2021 |
| Informed Consent Form 14.2 SCOFF + BEDS questionnaire_DE_V2.0_30Sep2021_translated 15Dec2021 2                                                 | 15.12.2021 |
| Informed Consent Form 14.1 SPIOMET4HEALTH_Emergency Card_final 1.0_DE_translated 15Sep2021 1                                                   | 15.09.2021 |
| Informed Consent Form 14.11 ede-q_questionnaire_DE_translated 15Sep2021 6                                                                      | 15.09.2021 |
| Informed Consent Form 14.6 SPIOMET4HEALTH_Patient Diary and Tablet Acceptability_final V1.0_29Sep2021_DE_translated 26Oct2021 1                | 26.10.2021 |
| Informed Consent Form 14.9 Questions LIP Evaluation_DE_translated 15Sep2021 1                                                                  | 15.09.2021 |
| Conflict of Interest Erklärung 18 Erklärung von Interessenkonflikten EC Graz SPIOMET4HEALTH_signed BOP 07092021 1                              | 07.09.2021 |
| Case Report Form 11.1 SPIOMET4HEALTH_eCRF summary list of variables_v1_04Oct2021 1                                                             | 04.10.2021 |
| Versicherungsbestätigung Chubb European Group SE ATLSCA05765                                                                                   | 03.11.2021 |
| Versicherungsbestätigung Chubb European Group SE ATLSCA05765                                                                                   | 29.11.2021 |
| CV 20.1 CV_Elke Froehlich-Reiterer 1                                                                                                           | 13.10.2020 |
| CV 19.1 CV Obermayer-Pietsch 2020 1                                                                                                            | 20.04.2020 |
| CV 20.4 GCP_Jasser-Nitsche 1                                                                                                                   | 04.02.2021 |
| CV 20.3 CV_Hildegard Jasser-Nitsche 1                                                                                                          | 02.05.2021 |
| CV 19.2 GCP_2020_Obermayer-Pietsch 1                                                                                                           | 10.01.2020 |
| CV 20.2 GCP_Fröhlich-Reiterer 1                                                                                                                | 04.02.2021 |
| EudraCT Formular (CT1) 04.4 2021-003177-58 AT 20211217 Validation Report 1                                                                     | 17.12.2021 |
| EudraCT Formular (CT1) 04.1 EUDRACT Number 2021-003177-58 1                                                                                    | 01.06.2021 |
| EudraCT Formular (CT1) 04.2 2021-003177-58 AT 20211217 CTA PDF Form (1) 1                                                                      | 17.12.2021 |
| Investigator's Brochure 12 SPIOMET-IB_v4_2021_12_16_signed 4                                                                                   | 16.12.2021 |
| SUSAR bzw. SAE 11.2 SPIOMET4HEALTH_SAE report form_v2.0_02Nov2021 2                                                                            | 02.11.2021 |
| Sonstiges: 16.2 Manual LIP_english_final_1.1_12Aug2021 1.1                                                                                     | 12.08.2021 |
| Sonstiges: 22 SPIOMET4HEALTH_Site list_final 1.0_25Oct2021_RM 1                                                                                | 25.10.2021 |
| Sonstiges: 16.3 Documentation Sheets_V1.0_03Aug2021 1                                                                                          | 03.08.2021 |
| Sonstiges: 02 Antrag auf Erlass der EK Gebühr 1                                                                                                | 17.12.2021 |
| Sonstiges: 05 Scientific Advice EMA 2017 1                                                                                                     | 18.05.2017 |
| Sonstiges: 03.2 Teil B 1                                                                                                                       | 07.09.2021 |
| Sonstiges: 16.1 SOP Eating Disorder_V1.0_24Aug2021 1                                                                                           | 24.08.2021 |
| Sonstiges: 06 002187-PIP01-17 Decision with annexes-1618582984814 1                                                                            | 16.04.2021 |
| Sonstiges: 07 FSJD_SPIOMET4HEALTH_LoA_Optimapharm_final 29Sep2021_clean_signed (1) 1                                                           | 01.10.2021 |
| Sonstiges: 21 Grant Agreement-899671-SPIOMET4HEALTH 1                                                                                          | 28.01.2021 |
| <b>Dokumente eingegangen am 22.12.2021, begutachtet in der Sitzung 04-21/22 am 17.01.2022</b>                                                  |            |
| ✓ Antragsformular ECS Unterschriftenseiten                                                                                                     | 20.12.2021 |

**Dokumente eingegangen am 15.02.2022 (in der nächsten Begutachtung mitbegutachtet)**

|                                                                                                                                                 |            |
|-------------------------------------------------------------------------------------------------------------------------------------------------|------------|
| ✓ Cover Letter 01 SPIOMET4HEALTH_Austria_Cover Letter_EC_Initial Submission - Reply_v1.0_15Feb2022_DE 2                                         | 15.02.2022 |
| ✓ Cover Letter 01 Anschreiben 1                                                                                                                 | 17.12.2021 |
| ✓ Antragsformular ECS 34-267 ex 21/22 inkl. Änderungen                                                                                          | 15.02.2022 |
| Originalprotokoll 09 SPIOMET4HEALTH_Protocol Synopsis_final V2.0_04Dec2021_DE_translated 15Dec2021 2                                            | 04.12.2021 |
| Originalprotokoll 08 SPIOMET4HEALTH_clinical study protocol_final 2.0_04Dec2021_clean 2                                                         | 04.12.2021 |
| Originalprotokoll 10 SPIOMET4HEALTH_clinical study protocol_final 2.0_04Dec2021_signature BOP Med Uni Graz 2                                    | 04.12.2021 |
| Informed Consent Form 13.3 SPIOMET4HEALTH_Austria_ICF for Adult Participants_v1.0_11Nov2021_DE_translated 07Dec2021 1                           | 07.12.2021 |
| ✓ Informed Consent Form 14.11 ede-q_questionnaire_DE_translated 15Sep2021 6                                                                     | 15.09.2021 |
| Informed Consent Form 13.2 SPIOMET4HEALTH_Austria_ICF for Adolescent Participants from 14 to 17 years_v1.0_11Nov2021_DE_translated 07Dec2021 1  | 07.12.2021 |
| ✓ Informed Consent Form 14.7 SPIOMET4HEALTH_Material-Evaluation-Trial-participants_final_DE_translated 15Sep2021 1                              | 15.09.2021 |
| ✓ Informed Consent Form 05.1 SPIOMET4HEALTH_Patient Diary Description_final 1.0_DE_14Feb2022 Clean 1                                            | 14.02.2022 |
| ✓ Informed Consent Form 05.2 SPIOMET4HEALTH_Questions LIP Evaluation_v2_14Jan2022_DE_translated 15Feb2022 TC 2                                  | 15.02.2022 |
| Informed Consent Form 04.4 SPIOMET4HEALTH_Austria_ICF for Parents_v2.0_20Jan2022_DE_14Feb2022 Clean 2                                           | 14.02.2022 |
| ✓ Informed Consent Form 14.3 SPIOMET4HEALTH_Brochure Lifestyle Intervention V2.0_05Nov2021_DE_translated 07Dec2021 2                            | 07.12.2021 |
| ✓ Informed Consent Form 05.4 German sf-36v2 standard 2                                                                                          | 28.02.2012 |
| ✓ Informed Consent Form 05.3 PCOSQ- G with validation 1                                                                                         | 16.12.2017 |
| Informed Consent Form 04.2 SPIOMET4HEALTH_Austria_ICF for Adolescent Participants from 14 to 17 years_v2_26Jan2022_DE_14Feb2022 TC 2            | 14.02.2022 |
| ✓ Informed Consent Form 14.6 SPIOMET4HEALTH_Patient Diary and Tablet Acceptability_final V1.0_29Sep2021_DE_translated 26Oct2021 1               | 26.10.2021 |
| Informed Consent Form 04.1 SPIOMET4HEALTH_Austrian_ICF for Adolescent Participants from 12 to 13 years_v2_20Jan2022_DE_14Feb2022 TC 2           | 14.02.2022 |
| ✓ Informed Consent Form 05.2 SPIOMET4HEALTH_Questions LIP Evaluation_v2_14Jan2022_DE_translated 15Feb2022 Clean 2                               | 15.02.2022 |
| ✓ Informed Consent Form 13.1 SPIOMET4HEALTH_Austrian_PI for Adolescent Participants from 12 to 14 Years_1.0_11Nov2021_DE_translated 07Dec2021 1 | 07.12.2021 |
| ✓ Informed Consent Form 14.10 Patient Engagement Task 5.4-flyer final-210701_MMM&Peggy_DE_translated 15Sep2021 1                                | 15.09.2021 |
| Informed Consent Form 13.4 SPIOMET4HEALTH_Austria_ICF for Parents_v1.0_11Nov2021_DE_translated 07Dec2021 1                                      | 07.12.2021 |
| ✓ Informed Consent Form 14.4 Spiomet4health_Storyboard_V1_DE_translated 15Sep2021 1                                                             | 15.09.2021 |
| Informed Consent Form 04.4 SPIOMET4HEALTH_Austria_ICF for Parents_v2.0_20Jan2022_DE_14Feb2022 TC 2                                              | 14.02.2022 |
| ✓ Informed Consent Form 14.8 SPIOMET4HEALTH_leaflet_DE_translated 15Sep2021 1                                                                   | 15.09.2021 |
| Informed Consent Form 04.1 SPIOMET4HEALTH_Austrian_ICF for Adolescent Participants from 12 to 13 years_v2_20Jan2022_DE_14Feb2022 Clean 2        | 14.02.2022 |
| ✓ Informed Consent Form 05.6 SPIOMET4HEALTH_pregnancy test tracker_final 1.0_20Jan2022_translated to GER on 14Feb2022 1                         | 14.02.2022 |
| Informed Consent Form 04.2 SPIOMET4HEALTH_Austria_ICF for Adolescent Participants from 14 to 17 years_v2_26Jan2022_DE_14Feb2022 Clean 2         | 14.02.2022 |
| ✓ Informed Consent Form 15.1 SPIOMET4HEALTH_Recruitment Campaign Plan V1.0, 27Oct2021_DE_translated 07Dec2021 1                                 | 07.12.2021 |
| ✓ Informed Consent Form 14.1 SPIOMET4HEALTH_Emergency Card_final 1.0_DE_translated 15Sep2021 1                                                  | 15.09.2021 |
| ✓ Informed Consent Form 14.2 SCOFF + BEDS questionnaire_DE_V2.0_30Sep2021_translated 15Dec2021 2                                                | 15.12.2021 |
| ✓ Informed Consent Form 05.1 SPIOMET4HEALTH_Patient Diary Description_final 1.0_DE_14Feb2022 TC 1                                               | 14.02.2022 |

|                                                                                                                      |            |
|----------------------------------------------------------------------------------------------------------------------|------------|
| Informed Consent Form 04.3 SPIOMET4HEALTH_Austria_ICF for Adult Participants_v2.0_20Jan2022_DE_14Feb2022 Clean 2     | 14.02.2022 |
| Informed Consent Form 04.3 SPIOMET4HEALTH_Austria_ICF for Adult Participants_v2.0_20Jan2022_DE_14Feb2022 TC 2        | 14.02.2022 |
| ✓ Informed Consent Form 14.9 Questions LIP Evaluation_DE_translated 15Sep2021 1                                      | 15.09.2021 |
| ✓ Informed Consent Form 15.2 SPIOMET4HEALTH_Webpage_V2.0_DE_translated 26Oct2021 2                                   | 26.10.2021 |
| ✓ Informed Consent Form 05.5 German SF-36v2 Interview Script Standard 2                                              | 10.09.2012 |
| ✓ Informed Consent Form 14.5 SPIOMET4HEALTH_Patient Diary Description_final V1.0_29Sep2021_DE_translated 26Oct2021 1 | 26.10.2021 |
| ✓ Conflict of Interest Erklärung 18 Erklärung von Interessenkonflikten EC Graz SPIOMET4HEALTH_signed BOP 07092021 1  | 07.09.2021 |
| ✓ Case Report Form 11.1 SPIOMET4HEALTH_eCRF summary list of variables_v1_04Oct2021 1                                 | 04.10.2021 |
| ✓ Versicherungsbestätigung Chubb European Group SE ATLSCA05765                                                       | 29.11.2021 |
| ✓ Versicherungsbestätigung Chubb European Group SE ATLSCA05765                                                       | 03.11.2021 |
| ✓ Versicherungsbestätigung Chubb European Group SE ATLSCA05765                                                       | 29.12.2021 |
| ✓ Versicherungsbestätigung Chubb European Group SE ATLSCA05765                                                       | 03.11.2021 |
| ✓ CV 19.1 CV Obermayer-Pietsch 2020 1                                                                                | 20.04.2020 |
| ✓ CV 19.2 GCP_2020_Obermayer-Pietsch 1                                                                               | 10.01.2020 |
| ✓ CV 20.2 GCP_Fröhlich-Reiterer 1                                                                                    | 04.02.2021 |
| ✓ CV 08.2 CV_Gumpold_2022 1                                                                                          | 10.01.2022 |
| ✓ CV 08.1 CV_Cornelia_Missbrenner_2022 1                                                                             | 26.01.2022 |
| ✓ CV 20.1 CV_Elke Froehlich-Reiterer 1                                                                               | 13.10.2020 |
| ✓ CV 08.3 CV_Tandl_signed 1                                                                                          | 27.01.2022 |
| ✓ CV 20.4 GCP_Jasser-Nitsche 1                                                                                       | 04.02.2021 |
| ✓ CV 20.3 CV_Hildegard Jasser-Nitsche 1                                                                              | 02.05.2021 |
| ✓ EudraCT Formular (CT1) 04.2 2021-003177-58 AT 20211217 CTA PDF Form (1) 1                                          | 17.12.2021 |
| ✓ EudraCT Formular (CT1) 04.1 EUDRACT Number 2021-003177-58 1                                                        | 01.06.2021 |
| ✓ EudraCT Formular (CT1) 04.4 2021-003177-58 AT 20211217 Validation Report 1                                         | 17.12.2021 |
| ✓ Investigator's Brochure 12 SPIOMET-IB_v4_2021_12_16_signed 4                                                       | 16.12.2021 |
| ✓ SUSAR bzw. SAE 11.2 SPIOMET4HEALTH_SAE report form_v2.0_02Nov2021 2                                                | 02.11.2021 |
| ✓ Sonstiges: 05 Scientific Advice EMA 2017 1                                                                         | 18.05.2017 |
| ✓ Sonstiges: 07 FSJD_SPIOMET4HEALTH_LoA_Optimapharm_final 29Sep2021_clean_signed (1) 1                               | 01.10.2021 |
| ✓ Sonstiges: 02 Antrag auf Erlass der EK Gebühr 1                                                                    | 17.12.2021 |
| ✓ Sonstiges: 16.1 SOP Eating Disorder_V1.0_24Aug2021 1                                                               | 24.08.2021 |
| ✓ Sonstiges: 06 002187-PIP01-17 Decision with annexes-1618582984814 1                                                | 16.04.2021 |
| ✓ Sonstiges: 21 Grant Agreement-899671-SPIOMET4HEALTH 1                                                              | 28.01.2021 |
| ✓ Sonstiges: 16.2 Manual LIP_english_final_1.1_12Aug2021 1.1                                                         | 12.08.2021 |
| ✓ Sonstiges: 03.2 Teil B 1                                                                                           | 07.09.2021 |
| ✓ Sonstiges: 16.3 Documentation Sheets_V1.0_03Aug2021 1                                                              | 03.08.2021 |
| ✓ Sonstiges: 22 SPIOMET4HEALTH_Site list_final 1.0_25Oct2021_RM 1                                                    | 25.10.2021 |
| ✓ Sonstiges: 03 SPIOMET4HEALTH_Statement on financial aspect of the study_final 1.0_14Feb2022 1                      | 14.02.2022 |

**Dokumente eingegangen am 11.03.2022 (in der nächsten Begutachtung mitbegutachtet)**

|                                                                                                            |            |
|------------------------------------------------------------------------------------------------------------|------------|
| ✓ Cover Letter                                                                                             | 15.02.2022 |
| Informed Consent Form Kinder (12-13 Jahre) 2.0                                                             | 14.02.2022 |
| Informed Consent Form Jugendliche (14-17 Jahre) 2.0                                                        | 14.02.2022 |
| Informed Consent Form 2.0                                                                                  | 14.02.2022 |
| Informed Consent Form Eltern 2.0                                                                           | 14.02.2022 |
| ✓ Fragebögen SF-36v2 Script 2012                                                                           |            |
| ✓ Fragebögen LIP 2.0                                                                                       | 15.02.2022 |
| ✓ Fragebögen SF-36v2 2012                                                                                  |            |
| ✓ Fragebögen PCOSQ- G undatiert                                                                            |            |
| ✓ Zahlungsbeleg                                                                                            | 01.02.2022 |
| ✓ Versicherungsbestätigung Chubb -Personenschaden mit Haftpflicht, Rechtsschutz und Bedingungen ATLSA05765 | 03.11.2021 |
| Versicherungsbestätigung Chubb ATLSA05765                                                                  | 29.12.2021 |
| ✓ CV Mitarbeiter Missbrenner                                                                               | 26.01.2022 |
| ✓ CV Mitarbeiter Gumpold                                                                                   | 10.01.2022 |
| ✓ CV Mitarbeiter Tandl                                                                                     | 27.01.2022 |
| ✓ Patienten-/Probandentagebuch 1.0                                                                         | 14.02.2022 |
| ✓ Sonstiges: Pregnancy Test Tracker 1.0                                                                    | 14.02.2022 |
| ✓ Sonstiges: GP Letter 2.0                                                                                 | 14.12.2021 |
| ✓ Sonstiges: Stellungnahme zur Bearbeitungsmitteilung                                                      | 14.02.2022 |

**Dokumente eingegangen am 20.04.2022, begutachtet im 'expedited Review' am 12.05.2022**

|                                                                       |            |
|-----------------------------------------------------------------------|------------|
| ✓ Cover Letter                                                        | 20.04.2022 |
| ✓ Originalprotokoll 3.0                                               | 16.03.2022 |
| ✓ Informed Consent Form Eltern 3.0                                    | 19.04.2022 |
| ✓ Informed Consent Form 3.0                                           | 19.04.2022 |
| ✓ Informed Consent Form Jugendliche (14-17 Jahre) 3.0                 | 19.04.2022 |
| ✓ Informed Consent Form Kinder (12-13 Jahre) 3.0                      | 19.04.2022 |
| ✓ Versicherungsbestätigung Chubb ATLSA05765                           | 11.04.2022 |
| ✓ Versicherungsbestätigung Chubb ATLSA05765                           | 03.11.2021 |
| ✓ Patienten-/Probandentagebuch 2.0                                    | 12.04.2022 |
| ✓ Sonstiges: mit Stellungnahme zur Bearbeitungsmitteilung (Biometrie) | 20.04.2022 |
| ✓ Sonstiges: mit Stellungnahme zur Bearbeitungsmitteilung (Glukose)   | 20.04.2022 |
| ✓ Protocol Signature Page Obermayer-Pietsch                           | 15.04.2022 |

Die Ethikkommission geht – rechtlich unverbindlich – davon aus, dass es sich um eine klinische Prüfung nach AMG handelt und macht darauf aufmerksam, dass vor Beginn der Prüfung ein ordnungsgemäßer Antrag auf Genehmigung an das Bundesamt für Sicherheit im Gesundheitswesen zu stellen ist.

Das Votum der Ethikkommission berührt in keiner Weise die alleinige Verantwortung der Prüferin / des Prüfers / der Prüfer für die ordnungsgemäße Durchführung der Studie unter Einhaltung aller einschlägiger gesetzlicher Bestimmungen und Richtlinien.

Weiters machen wir darauf aufmerksam, dass der Kommission unverzüglich zu melden sind:

- Abweichungen vom Protokoll aus Sicherheitsgründen oder Protokolländerungen
- Änderungen, die das Risiko der Teilnehmer/-innen erhöhen oder die Durchführung der Studie wesentlich beeinflussen
- Mutmaßliche unerwartete schwerwiegende Nebenwirkungen - SUSARs (AMG-Studien ab 1.5.2004) oder schwerwiegende unerwünschte Ereignisse - SAEs (andere Studien)
- Jegliche Information über sonstige Umstände, die die Sicherheit der Teilnehmer/-innen oder die Durchführung der Studie beeinträchtigen können

**Begründung:** Es handelt sich um eine relevante Fragestellung, die mit geeigneter Methodik

beantwortet werden soll. Die vom Antragsteller vorgenommene Bewertung des Nutzen/Risiko-Verhältnisses ist plausibel.

Dieses Votum gilt für ein Jahr ab dem Datum der Ausstellung. Bei längerer Studiendauer ist rechtzeitig vor Ablauf der Gültigkeit des Votums ein Zwischenbericht vorzulegen (Berichtsformular), um eine etwaige Verlängerung zu erlangen.

Graz, 12. Mai 2022



---

Univ. Prof. DI Dr. Josef Haas  
Vorsitzender



---

Univ. Prof. Dr. Hans Peter Dimai  
Stv. Vorsitzender

**Achtung:** Bitte bei allen das Projekt betreffende Schreiben oder telefonischen Anfragen die EK-Nummer angeben!

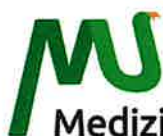

## Liste der stimmberechtigten bzw. anwesenden Mitglieder

am 17. Jänner 2022

Univ.Prof.DI Dr.Andrea Berghold  
Univ.Prof.Dr. Hans P. Dimai  
Univ.Prof.Dr.Thomas Griesbacher  
Univ.Prof.DI Dr.Josef Haas  
PD.Dr.Christian Fazekas  
Dr. Aitak Farzi  
Univ.Prof.Dr.Elisabeth Mahla  
Univ.Prof.Dr.Friedrich Reiterer  
DI Dr.Regina Riedl  
Univ.Prof.Dr.Rudolf Stauber  
Univ.Prof.Dr.Hermann Toplak  
Elisabeth Trummer, BA  
Ursula Vennemann  
MMag.a Anna Weiß  
Ing.Franz Deutschmann  
Univ.Prof.Dr. Leopold Neuhold  
Univ.Prof.Dr.Peter J. Schick  
Univ.Prof.Dr. Michael Speicher  
Ass.-Prof.Dr.jur. Armin-Bernhard Stolz  
Univ.Prof.Dr.Kurt Weber  
Univ.Prof.Dr.Andreas Zimmer

### Beigezogene Fachärzte

Prof. PD DMBalic  
PD DDr.Susanne Bengesser  
Assoz. Prof. PD Dr.Jörg Lindenmann  
Ao.Univ.-Prof. Dr.med.univ.Rainer Lipp  
Univ.Prof.Dr.Wolfgang Schwinger  
Assoz.Prof. PD Dr.Georg Singer  
Univ.Prof.Dr.Peter Wolf

## CERTIFICATION OF TRANSLATION

**Quote number:** 2205-06332

**Source document:** ek0000421991.pdf

**Full Title of Documents:** ek0000421991\_ translated into English on 2June2022.docx

**Footer:** ek0000421991\_translated into English 2June2022.docx

**Original Source Language of Document:** German  
**Language Document is to be Translated into:** English

### Declaration of Translator:

I, Jan Hirš on behalf of Skrivanek s. r. o., hereby certify that the translation into English agrees with the text of the original document in German language, that there were no changes/corrections made to the original document neither the translation, and that it was translated by a certified translator fluent in both above mentioned languages.

I, Jan Hirš on behalf of Skrivanek s. r. o., also confirm that the above mentioned service has been rendered and that the translated document is to the best of my knowledge a true and faithful translation of the original document as provided by the client

With Best regards,

A handwritten signature in blue ink, appearing to read 'J. Hirš', is located at the bottom left of the page.



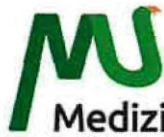

## VOTE

valid until 12/05/2023

**EC number:** 34-169 ex 21/22      **EudraCT no:** 2021-003177-58  
1608-2021

**Study title:** A Phase II, randomised, multi-centric, multi-national clinical trial to evaluate the efficacy, tolerability, and safety of a fixed dose combination of Spironolactone, Pioglitazone & Metformin (SPIOMET) for adolescent girls and young adult women (AYAs) with polycystic ovary syndrome (PCOS).

**Examiner:** Professor Dr med. Barbara Obermayer-Pietsch  
MU Graz. University Clinic for Internal Medicine, Dept. of Endocrinology and Diabetology

**Sponsor:** Fundació Sant Joan de Déu  
**Contact person:** Prof. Lourdes Ibáñez, 08950 Esplugues de Llobregat, C/ Santa Rosa, 39-57, 4a planta

**CRO:** Optimapharm d.o.o.  
**Contact person:** MPharm Vladimir Vujovic, 10000 Zagreb, Ulica grada Vukovara 284

**Applicant:** Optimapharm d.o.o.  
**Contact person:** MPharm Vladimir Vujovic, 10000 Zagreb, Ulica grada Vukovara 284

The above study was first discussed by the Ethics Committee at the meeting 04-21/22 on 17/01/2022.  
The Ethics Committee has come to the following conclusion:

**There is no objection to conducting the study in its present form.**

Members entitled to vote or who were present during the discussion were: see attached list of 17/01/2022.

Committee members who were considered biased for this agenda item and therefore, in accordance with the procedure, were excluded from the decision-making and voting: none.

### Documents available for evaluation:

Documents received on 17/12/2021, reviewed at the meeting 04-21/22 on 17/01/2022.

|                                                                                                                                                   |            |
|---------------------------------------------------------------------------------------------------------------------------------------------------|------------|
| ✓ Cover Letter 01 Anschreiben 1                                                                                                                   | 17/12/2021 |
| ✓ ECS application form                                                                                                                            | 17/12/2021 |
| Original protocol 10 SPIOMET4HEALTH_clinical study protocol_final<br>2.0_04Dec2021_signature BOP Med Uni Graz 2                                   | 04/12/2021 |
| Original protocol 08 SPIOMET4HEALTH_clinical study protocol_final<br>2.0_04Dec2021_clean 2                                                        | 04/12/2021 |
| Original protocol 09 SPIOMET4HEALTH_Protocol Synopsis_final<br>V2.0_04Dec2021_DE_translated 15Dec2021 2                                           | 04/12/2021 |
| Informed Consent Form 15.2 SPIOMET4HEALTH_Webpage_V2.0_DE_translated<br>26Oct2021 2                                                               | 26/10/2021 |
| Informed Consent Form 13.1 SPIOMET4HEALTH_Austrian_PI for Adolescent<br>Participants from 12 to 14 YearsJ .0_11 Nov2021_DE_translated 07Dec2021 1 | 07/12/2021 |
| Informed Consent Form 14.3 SPIOMET4HEALTH Brochure Lifestyle Intervention<br>V2.0, 05Nov2021_DE_translated 07Dec2021 2                            | 07/12/2021 |

|                                                                                                                                              |            |
|----------------------------------------------------------------------------------------------------------------------------------------------|------------|
| Informed Consent Form 13.3 SPIOMET4HEALTH_Austria_ICF for Adult Participants_v1.0_11Nov2021_DE_translated 07Dec2021 1                        | 07/12/2021 |
| Informed Consent Form 14.10 Patient Engagement Task 5.4-flyer final-210701_MMM&Peggy_DE_translated 15Sep2021 1                               | 15/09/2021 |
| Informed Consent Form 14.5 SPIOMET4HEALTH_Patient Diary Descriptionjinal V1.0_29Sep2021_DE_translated 26Oct2021 1                            | 26/10/2021 |
| Informed Consent Form 15.1 SPIOMET4HEALTH Recruitment Campaign Plan V1.0, 07/12/2021 27Oct2021_DE_translated 07Dec2021 1                     |            |
| Informed Consent Form 14.4 Spiomet4health_Storyboard_V1_DE_translated 15Sep2021 1                                                            | 15/09/2021 |
| Informed Consent Form 13.4 SPIOMET4HEALTH_Austria_ICF for Parents_v1.0_11Nov2021_DE_translated 07Dec2021 1                                   | 07/12/2021 |
| Informed Consent Form 13.2 SPIOMET4HEALTH_Austria_ICF for Adolescent Participants from 14to 17years_v1.0_11Nov2021_DE_translated 07Dec2021 1 | 07/12/2021 |
| Informed Consent Form 14.7 SPIOMET4HEALTH_Material-Evaluation-Trial-participants_final_DE_translated 15Sep2021 1                             | 15/09/2021 |
| Informed Consent Form 14.8 SPIOMET4HEALTH_leaflet_DE_translated 15Sep2021 1                                                                  | 15/09/2021 |
| Informed Consent Form 14.2 SCOFF + BEDS questionnaire_DE_V2.0_30Sep2021_translated 15Dec2021 2                                               | 15/12/2021 |
| Informed Consent Form 14.1 SPIOMET4HEALTH_Emergency Cardjinal 1.0_DE_translated 15Sep2021 1                                                  | 15/09/2021 |
| Informed Consent Form 14.11 ede-q_questionnaire_DE_translated 15Sep2021 6                                                                    | 15/09/2021 |
| Informed Consent Form 14.6 SPIOMET4HEALTH_Patient Diary and Tablet Acceptabilityjinal V1.0_29Sep2021_DE_translated 26Oct2021 1               | 26/10/2021 |
| Informed Consent Form 14.9 Questions LIP Evaluation_DE_translated 15Sep2021 1 15/09/2021                                                     |            |
| Conflict of Interest Statement 18 Erklärung von Interessenkonflikten EC Graz SPIOMET4HEALTH_signed BOP 07092021 1                            | 07/09/2021 |
| Case Report Form 11.1 SPIOMET4HEALTH_eCRF summary list of variables_v1_04Oct2021 1                                                           | 04/10/2021 |
| Confirmation of insurance Chubb European Group SE ATLSA05765                                                                                 | 03/11/2021 |
| Versicherungsbestätigung Chubb European Group SE ATLSA05765                                                                                  | 29/11/2021 |
| CV 20.1 CV_Elke Froehlich-Reiterer 1                                                                                                         | 13/10/2020 |
| CV 19.1 CV Obermayer-Pietsch 2020 1                                                                                                          | 20/04/2020 |
| CV 20.4 GCP_Jasser-Nitsche 1                                                                                                                 | 04/02/2021 |
| CV 20.3 CVJHildegard Jasser-Nitsche 1                                                                                                        | 02/05/2021 |
| CV 19.2 GCP_2020_Obermayer-Pietsch 1                                                                                                         | 10/01/2020 |
| CV 20.2 GCP_Fröhlich-Reiterer 1                                                                                                              | 04/02/2021 |
| EudraCT Formular (CT1) 04.4 2021-003177-58 AT 20211217 Validation Report 1                                                                   | 17/12/2021 |
| EudraCT Formular (CT1) 04.1 EUDRACT Number 2021-003177-58 1                                                                                  | 01/06/2021 |
| EudraCT Form (CT1) 04.2 2021-003177-58 -20211217 AT 1 CTA PDF Form (1) 17/12/2021                                                            |            |
| Investigator's Brochure 12 SPIOMET-IB_v4_2021_12_16_signed 4                                                                                 | 16/12/2021 |
| SUSAR resp. SAE 11.2 SPIOMET4HEALTH_SAE report form_v2.0_02Nov2021 2                                                                         | 02/11/2021 |
| Other: 16.2 Manual LIP_english_finaM-1_12Aug2021 1.1                                                                                         | 12/08/2021 |
| Other: 22 SPIOMET4HEALTH_Site listjinal 1.0_25Oct2021_RM 1                                                                                   | 25/10/2021 |
| Other: 16.3 Documentation Sheets_V1.0_03Aug2021 1                                                                                            | 03/08/2021 |
| Other: 02 Application for waiver of the EC fee 1                                                                                             | 17/12/2021 |
| Other: 05 Scientific Advice EMA 2017 1                                                                                                       | 18/05/2017 |
| Other: 03.2 Teil B 1                                                                                                                         | 07/09/2021 |
| Other: 16.1 SOP Eating Disorder_V1.0_24Aug2021 1                                                                                             | 24/08/2021 |
| Other: 06 002187-PIP01-17 Decision with annexes-1618582984814 1                                                                              | 16/04/2021 |
| Other: 07 FSJD_SPIOMET4HEALTH_LoA_Optimapharm_final 29Sep2021_clean_signed (1) 1                                                             | 01/10/2021 |
| Other: 21 Grant Agreement-899671-SPIOMET4HEALTH 1                                                                                            | 28/01/2021 |
| <b>Documents received on 22/12/2021, reviewed at the meeting 04-21/22 on 17/01/2022</b>                                                      |            |
| ✓ ECS Application form signature pages                                                                                                       | 20/12/2021 |

**Documents received on 15/02/2022 (assessment included in the next review)**

- ✓ Cover Letter 01 SPIOMET4HEALTH\_Austria\_Cover Letter\_ECJnitial Submission - 15/02/2022  
Reply\_v1.0\_15Feb2022\_DE 2
- ✓ Cover Letter 01 Anschreiben 1 17/12/2021
- ✓ Application form ECS 34-267 ex 21/22 incl. amendments 15/02/2022
- Original protocol 09 SPIOMET4HEALTH\_Protocol Synopsis\_final 04/12/2021  
V2.0\_04Dec2021 JDEJrnslated 15Dec2021 2
- Original protocol 08 SPIOMET4HEALTH\_clinical study protocolLfinal 04/12/2021  
2.0\_04Dec2021\_clean 2
- Original protocol 10 SPIOMET4HEALTH\_clinical study protocol\_final 04/12/2021  
2.0\_04Dec2021\_signature BOP Med Uni Graz 2
- Informed Consent Form 13.3 SPIOMET4HEALTH\_Austria\_ICF for Adult 07/12/2021  
Participants\_v1.0\_11Nov2021\_DE\_translated 07Dec2021 1
- ✓ Informed Consent Form 14.11 ede-q\_questionnaire\_DE\_translated 15Sep2021 6 15/09/2021
- Informed Consent Form 13.2 SPIOMET4HEALTH\_Austria\_ICF for Adolescent 07/12/2021  
Participants from 14 to 17 years\_v1.0\_11 Nov2021\_DE\_translated 07Dec2021 1
- ✓ Informed Consent Form 14.7 SPIOMET4HEALTH\_Material-Evaluation-Trial- 15/09/2021  
participants\_final\_DE\_translated 15Sep2021 1
- Informed Consent Form 05.1 SPIOMET4HEALTH\_Patient Diary Description\_final 14/02/2022  
1.0\_DE\_14Feb2022 Clean 1
- ✓ Informed Consent Form 05.2 SPIOMET4HEALTH\_Questions LIP 15/02/2022  
Evaluation\_v2\_14Jan2022\_DE\_translated 15Feb2022 TC 2
- Informed Consent Form 04.4 SPIOMET4HEALTH\_Austria\_ICF for 14/02/2022  
Parents\_v2.0\_20Jan2022\_DE\_14Feb2022 Clean 2
- ✓ Informed Consent Form 14.3 SPIOMET4HEALTH\_Brochure Lifestyle Intervention 07/12/2021  
V2.0\_05Nov2021\_DE\_translated 07Dec2021 2
- ✓ Informed Consent Form 05.4 German sf-36v2 Standard 2 28/02/2012
- ✓ Informed Consent Form 05.3 PCOSQ-G with validation 1 16/12/2017
- Informed Consent Form 04.2 SPIOMET4HEALTH\_Austria\_ICF for Adolescent 14/02/2022  
Participants from 14 to 17 years\_v2 26Jan2022\_DE 14Feb2022 TC 2
- ✓ Informed Consent Form 14.6 SPIOMET4HEALTH\_Patient Diary and Tablet 26/10/2021  
Acceptabilityjinal V1.0\_29Sep2021\_DEJrnslated 26Oct2021 1
- Informed Consent Form 04.1 SPIOMET4HEALTH\_Austrian\_ICF for Adolescent 14/02/2022  
Participants from 12 to 13 years\_v2\_20Jan2022\_DE\_14Feb2022 TC 2
- ✓ Informed Consent Form 05.2 SPIOMET4HEALTH\_Questions LIP 15/02/2022  
Evaluation\_v2\_14Jan2022\_DE\_translated 15Feb2022 Clean 2
- ✓ Informed Consent Form 13.1 SPIOMET4HEALTH\_Austrian\_PI for Adolescent 07/12/2021  
Participants from 12to 14 Years\_1.0\_11Nov2021\_DE\_translated 07Dec2021 1
- ✓ Informed Consent Form 14.10 Patient Engagement Task 5.4-flyer final- 15/09/2021  
210701\_MMM&Peggy\_DE\_translated 15Sep2021 1
- Informed Consent Form 13.4 SPIOMET4HEALTH\_Austria\_ICF for 07/12/2021  
Parents\_v1.0\_11Nov2021JDE\_translated 07Dec2021 1
- ✓ Informed Consent Form 14.4Spiomet4health\_Storyboard\_V1\_DE\_translated 15/09/2021  
15Sep2021 1
- Informed Consent Form 04.4 SPIOMET4HEALTH\_Austria\_ICF for 14/02/2022  
Parents\_v2.0\_20Jan2022\_DE\_14Feb2022 TC 2
- ✓ Informed Consent Form 14.8 SPIOMET4HEALTH\_leaflet\_DE\_translated 15Sep2021 15/09/2021  
1
- Informed Consent Form 04.1 SPIOMET4HEALTH\_Austrian\_ICF for Adolescent 14/02/2022  
Participants from 12 to 13 years\_v2\_20Jan2022\_DE\_14Feb2022 Clean 2
- ✓ Informed Consent Form 05.6 SPIOMET4HEALTH\_pregnancy test trackerjinal 14/02/2022  
1.0\_20Jan2022Jrnslated to GER on 14Feb2022 1
- Informed Consent Form 04.2 SPIOMET4HEALTH\_Austria\_ICF for Adolescent 14/02/2022  
Participants from 14to 17 years\_v2 26Jan2022\_DE 14Feb2022 Clean 2
- ✓ Informed Consent Form 15.1 SPIOMET4HEALTH\_Recruitment Campaign Plan V1.0, 07/12/2021 27Oct2021\_DE\_translated 07Dec2021 1
- ✓ Informed Consent Form 14.1 SPIOMET4HEALTH\_Emergency Cardjinal 15/09/2021  
1.0\_DE\_translated15Sep2021 1
- ✓ Informed Consent Form 14.2 SCOFF + BEDS 15/12/2021  
questionnaire\_DE\_V2.0\_30Sep2021\_translated 15Dec2021 2
- ✓ Informed Consent Form 05.1 SPIOMET4HEALTH\_Patient Diary Descriptionjinal 14/02/2022  
1.0 DE 14Feb2022TC1

|                                                                                                                     |            |
|---------------------------------------------------------------------------------------------------------------------|------------|
| ✓ Informed Consent Form 04.3 SPIOMET4HEALTH„Austria_ICFfor Adult Participants_v2.0_20Jan2022_DE_14Feb2022 Clean 2   | 14/02/2022 |
| Informed Consent Form 04.3 SPIOMET4HEALTH_Austria_ICF for Adult Participants_v2.0_20Jan2022_DEJ4Feb2022 TC 2        | 14/02/2022 |
| ✓ Informed Consent Form 14.9 Questions LIP Evaluation_DE_translated 15Sep2021 1                                     | 15/09/2021 |
| ✓ Informed Consent Form 15.2 SPIOMET4HEALTH_Webpage_V2.0_DE_translated 26Oct2021 2                                  | 26/10/2021 |
| ✓ •Informed Consent Form 05.5 German SF-36v2 Interview Script Standard 2                                            | 10/09/2012 |
| ✓ Informed Consent Form 14.5 SPIOMET4HEALTH_Patient Diary Descriptionjinal V1.0_29Sep2021_DE_translated 26Oct2021 1 | 26/10/2021 |
| ✓ Conflict of Interest Statement 18 Erklärung von Interessenkonflikten EC Graz SPIOMET4HEALTH_signed BOP 07092021 1 | 07/09/2021 |
| ✓ Case Report Form 11.1 SPIOMET4HEALTH_eCRF summary list of variables_v1_04Oct2021 1                                | 04/10/2021 |
| ✓ Versicherungsbestätigung Chubb European Group SE ATLSA05765                                                       | 29/11/2021 |
| ✓ Confirmation of insurance Chubb European Group SE ATLSA05765                                                      | 03/11/2021 |
| Confirmation of insurance Chubb European Group SE ATLSA05765                                                        | 29/12/2021 |
| ✓ Confirmation of insurance Chubb European Group SE ATLSA05765                                                      | 03/11/2021 |
| ✓ CV 19.1 CV Obermayer-Pietsch 2020 1                                                                               | 20/04/2020 |
| ✓ CV19.2GCP_2020_Obermayer-Pietsch 1                                                                                | 10/01/2020 |
| ✓ CV 20.2 GCP_Fröhlich-Reiterer 1                                                                                   | 04/02/2021 |
| ✓ CV 08.2 CV_Gumpold_2022 1                                                                                         | 10/01/2022 |
| ✓ CV 08.1 CV_CorneliaJv1issbrenner_2022 1                                                                           | 26/01/2022 |
| ✓ CV 20.1 CV_Elke Froehlich-Reiterer 1                                                                              | 13/10/2020 |
| ✓ CV 08.3 CV_Tandl_signed 1                                                                                         | 27/01/2022 |
| ✓ CV 20.4 GCP_Jasser-Nitsche 1                                                                                      | 04/02/2021 |
| ✓ CV 20.3 CV_Hildegard Jasser-Nitsche 1                                                                             | 02/05/2021 |
| ✓ EudraCT Formular (CT1) 04.2 2021-003177-58 AT 20211217 CTA PDF Form (1) 1                                         | 17/12/2021 |
| ✓ EudraCT Formular (CT1) 04.1 EUDRACT Number 2021 -003177-58 1                                                      | 01/06/2021 |
| ✓ EudraCT Formular (CT1) 04.4 2021-003177-58 AT 20211217 Validation Report 1                                        | 17/12/2021 |
| ✓ Investigator's Brochure 12 SPIOMET-IB_v4_2021_12_16_signed 4                                                      | 16/12/2021 |
| ✓ SUSAR resp. SAE 11.2 SPIOMET4HEALTH_SAE report form_v2.0_02Nov2021 2                                              | 02/11/2021 |
| ✓ Other: 05 Scientific Advice EMA 2017 1                                                                            | 18/05/2017 |
| ✓ Other: 07 FSJD_SPIOMET4HEALTH_LoA_Optimapharm_final 29Sep2021_clean_signed (1) 1                                  | 01/10/2021 |
| ✓ Other: 02 Application for waiver of the EC fee 1                                                                  | 17/12/2021 |
| ✓ Other: 16.1 SOP Eating Disorder_V1.0_24Aug2021 1                                                                  | 24/08/2021 |
| ✓ Other: 06 002187-PIP01-17 Decision with annexes-1618582984814 1                                                   | 16/04/2021 |
| ✓ Other: 21 Grant Agreement-899671-SPIOMET4HEALTH 1                                                                 | 28/01/2021 |
| ✓ Other: 16.2 Manual LIP_english_finaM.1_12Aug2021 1.1                                                              | 12/08/2021 |
| ✓ Other: 03.2 Teil B 1                                                                                              | 07/09/2021 |
| ✓ Other: 16.3 Documentation Sheets_V1.0_03Aug2021 1                                                                 | 03/08/2021 |
| ✓ Other: 22 SPIOMET4HEALTH_Site list_final 1.0_25Oct2021_RM 1                                                       | 25/10/2021 |
| ✓ Other: 03 SPIOMET4HEALTH_Statement on financial aspect of the studyjinal 1.0 14Feb2022 1                          | 14/02/2022 |

**Documents received on 11/03/2022 (assessment included in the next review)**

|                                                                                                                           |            |
|---------------------------------------------------------------------------------------------------------------------------|------------|
| ✓ Cover Letter                                                                                                            | 15/02/2022 |
| Informed Consent Form Children (12-13 years) 2.0                                                                          | 14/02/2022 |
| Informed Consent Form Youth (14-17 years) 2.0                                                                             | 14/02/2022 |
| Informed Consent Form 2.0                                                                                                 | 14/02/2022 |
| Informed Consent Form Parents 2.0                                                                                         | 14/02/2022 |
| ✓ Questionnaires SF-36v2 Script 2012                                                                                      |            |
| ✓ Questionnaires LIP 2.0                                                                                                  | 15/02/2022 |
| ✓ Questionnaires SF-36v2 2012                                                                                             |            |
| ✓ Questionnaires PCOSQ- G undated                                                                                         |            |
| ✓ Payment receipt                                                                                                         | 01/02/2022 |
| ✓ Confirmation of insurance Chubb -Personal injury with liability, legal protection 03/11/2021 and conditions ATLSCA05765 |            |
| ✓ Confirmation of insurance Chubb ATLSCA05765                                                                             | 29/12/2021 |
| ✓ CV Staff member Missbrenner                                                                                             | 26/01/2022 |
| ✓ CV Staff member Gumpold                                                                                                 | 10/01/2022 |
| ✓ CV Staff member Tandl                                                                                                   | 27/01/2022 |
| ✓ Patient/proband diary 1.0 14/02/2022                                                                                    |            |
| ✓ Other: Pregnancy Test Tracker 1.0                                                                                       | 14/02/2022 |
| ✓ Other: GP Letter 2.0                                                                                                    | 14/12/2021 |
| ✓ Other: Statement on the processing notification 14/02/2022                                                              |            |

**Documents received on 20/04/2022, reviewed at the 'expedited Review' meeting on 12/05/2022**

|                                                                                |            |
|--------------------------------------------------------------------------------|------------|
| ✓ Cover Letter                                                                 | 20/04/2022 |
| ✓ Original protocol 3.0 16/03/2022                                             |            |
| ✓ Informed Consent Form Parents 3.0 19/04/2022                                 |            |
| ✓ Informed Consent Form 3.0                                                    | 19/04/2022 |
| ✓ Informed Consent Form Youth (14-17 years) 3.0                                | 19/04/2022 |
| ✓ Informed Consent Form Children (12-13 years) 3.0                             | 19/04/2022 |
| ✓ Confirmation of insurance Chubb ATLSCA05765                                  | 11/04/2022 |
| ✓ Confirmation of insurance Chubb ATLSCA05765                                  | 03/11/2021 |
| ✓ Patient/proband diary 2.0                                                    | 12/04/2022 |
| ✓ Other: with statement on the processing notification (biometrics)            | 20/04/2022 |
| ✓ Other: with statement on the processing notification (biometrics) 20/04/2022 |            |
| ✓ Protocol Signatuře Page Obermayer-Pietsch                                    | 15/04/2022 |

The Ethics Committee assumes – without any legal obligation – that this is a clinical trial according to the AMG and stresses that a proper request for authorisation must be submitted to the Austrian Federal Office for Safety in Health Care before the trial begins.

The vote of the Ethics Committee in no way affects the sole responsibility of the examiner(s) for the proper conduct of the study in compliance with all relevant legal provisions and guidelines.

Furthermore, we draw your attention to the fact that the Commission must be notified immediately about:

- Deviations from the protocol for security reasons or protocol amendments
- Changes that increase the risk to the participants or significantly affect the conduct of the study
- Suspected unexpected serious adverse events - SUSARs (AMG studies as of 01/05/2004) or serious adverse events - SAEs (other studies)
- Any information about other circumstances that may affect the safety of the participants or the conduct of the study

**Rationale:**

This is a relevant question that should be answered using appropriate methodology. The applicant's assessment of the benefit/risk ratio is plausible.

This vote is valid for one year from the date of issue. In the case of a longer duration of the study, an interim report must be submitted in good time before the expiry of the validity of the vote (report form) in order to obtain a possible extension.

Graz, 12 May 2022



Univ. Prof. i.R. Dr. Josef Haas  
Chairman



Univ. Prof. Dr. Hans Peter Dimai  
Dep. Chairman

**Note:** Please quote the EC number in all letters or phone enquiries concerning the project!

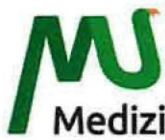

## List of members entitled to vote or be present

on 17 January 2022

Univ. Prof. DI Dr Andrea Berghold  
Univ. Prof. Dr Hans P. Dimai  
Univ. Prof. Dr Thomas Griesbacher  
Univ. Prof. DI Dr Josef Haas  
PD. Dr Christian Fazekas  
Dr Aitak Farzi  
Univ. Prof. Dr Elisabeth Mahla  
Univ. Prof. Dr Friedrich Reiterer  
DI Dr Regina Riedl  
Univ. Prof. Dr Rudolf Stauber  
Univ. Prof. Dr Hermann Toplak  
Elisabeth Trümmer, BA  
Ursula Vennemann  
MMag.a Anna Weiss  
Ing. Franz Deutschmann  
Univ. Prof. Dr Leopold Neuhold  
Univ. Prof. Dr Peter J. Schick  
Univ. Prof. Dr Michael Speicher  
Ass.-Prof. Dr jur. Armin-Bernhard Stolz  
Univ. Prof. Dr Kurt Weber  
Univ. Prof. Dr Andreas Zimmer

### **Associated medical specialists**

Prof. PD DMBalic  
PD DDr Susanne Bengesser  
Assoc. Prof. PD Dr Jörg Lindenmann  
Ao. Univ. Prof. Dr med. univ. Rainer Lipp  
Univ. Prof. Dr Wolfgang Schwinger  
Assoc. Prof. PD Dr Georg Singer  
Univ. Prof. Dr Peter Wolf

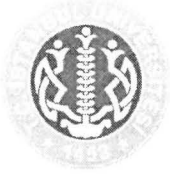

T.C.  
**İSTANBUL ÜNİVERSİTESİ**  
**İSTANBUL TIP FAKÜLTESİ**  
**KLİNİK ARAŞTIRMALAR ETİK KURULU**

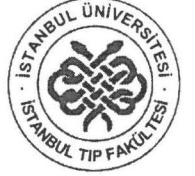

Sayı : 2011-KAEK-57 – 722

Tarih : 21.04.2022

Konu : Klinik Araştırma (SPIOMET4HEALTH) hk.

**Monitör Medikal Araştırma ve Danışmanlık Ltd. Şti.**  
**Cumhuriyet Mah. Hacıahmet Silahşör Cad, Yeniyol Sk. Now Bomonti No:2, Kat:7**  
**Ofis No:58 P.K.34440 Şişli/İstanbul**  
**Tel: (212) 234 12 60 Fax: (212) 234 19 53**

**İlgi : 21.03.2022 tarihli yazınız**

Koordinatörlüğünü ve sorumlu araştırmacılığını İstanbul Üniversitesi İstanbul Tıp Fakültesi Çocuk Sağlığı ve Hastalıkları Anabilim Dalı Öğretim Üyesi Prof. Dr. Fatma Feyza DARENDELİLER' in üstlendiği 2022/137 dosya numaralı "Polikistik over sendromu (PCOS) olan ergen ve genç yetişkin kadınlarda (AYA) sabit doz Spironolakton, Pioglitazon ve Metformin (SPIOMET) kombinasyonu etkinliği, toleransı ve güvenilirliğini değerlendirmek için Faz II, randomize, çok merkezli, çok uluslu klinik çalışma" başlıklı araştırmasına ait; Klinik Araştırmalarda Önemli Değişiklik Başvuru Formu, Bilgilendirilmiş Gönüllü Olur Formu (Ergen, Ebeveyn ve Yetişkin) (10.03.2022 tarihli, Versiyon 1.0, Türkçe), Sigorta Zeyilnamesi (Poliçe No: TRLSCA40621, Zeyil No: 1, Başlangıç Tarihi: 01.04.2022 - Bitiş Tarihi: 01.04.2027, Tanzim Tarihi: 01.04.2022), Sigorta Sertifikası (Poliçe No: TRLSCA40621, Başlangıç Tarihi: 01.04.2022 - Bitiş Tarihi: 01.04.2027, Tanzim Tarihi: 14.03.2022), Sigorta Sertifikası (Poliçe No: TRLSCA40621, Başlangıç Tarihi: 01.04.2022 - Bitiş Tarihi: 01.04.2025, Tanzim Tarihi: 14.01.2022), Sigorta Poliçesi (Poliçe No: TRLSCA40621, Başlangıç Tarihi: 01.04.2022 - Bitiş Tarihi: 01.04.2025, Tanzim Tarihi: 01.04.2022), kurulumuzun 08/04/2022 tarihli 07 sayılı toplantısında değerlendirilmiş ve uygun bulunmuştur.

Yazımızın bir örneğinin çalışma koordinatörüne ve/veya sorumlu araştırmacıya, destekleyiciye ve diğer merkezlere iletilmesi hususunda bilginizi ve gereğini rica ederim.

  
Prof. Dr. A.Yağız ÜRESİN

**İstanbul Tıp Fakültesi Klinik Araştırmalar**  
**Etik Kurul Başkanı**

Eki: "Covid-19 pandemi tedbirleri doğrultusunda online toplantı yapılmış olup, toplantıya 11 üye katılımı ve oy birliği ile karar verilmiştir"



## CERTIFICATION OF TRANSLATION

**Quote number:** 2205-00396

**Source document:** SPIOMET4HEALTH\_TUR\_EC approval\_21Apr2022.pdf

**Full Title of Documents:** SPIOMET4HEALTH\_TUR\_EC approval\_21Apr2022\_EN\_translated  
13May2022.docx

**Footer:** SPIOMET4HEALTH\_TUR\_EC approval\_21Apr2022, translated into English on 13May2022

**Original Source Language of Document:** Turkish  
**Language Document is to be Translated into:** English

### Declaration of Translator:

I, Jan Hirš on behalf of Skrivanek s. r. o., hereby certify that the translation into English agrees with the text of the original document in Turkish language, that there were no changes/corrections made to the original document neither the translation, and that it was translated by a certified translator fluent in both above mentioned languages.

I, Jan Hirš on behalf of Skrivanek s. r. o., also confirm that the above mentioned service has been rendered and that the translated document is to the best of my knowledge a true and faithful translation of the original document as provided by the client

With Best regards,



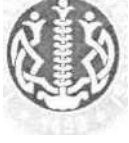

REPUBLIC OF TURKEY  
ISTANBUL UNIVERSITY  
ISTANBUL FACULTY OF MEDICINE  
CLINICAL RESEARCH ETHICS COMMITTEE

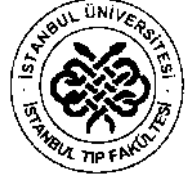

Issue : 2011-KAEK-57 - 722

Date : 21.04.2022

Subject : About the Clinical Trial (SPIOMET4HEALTH)

**Monitör Medikal Araştırma ve Danışmanlık Ltd. Şti.**  
**Cumhuriyet Mah. Hacıahmet Silahşör Cad, Yeni Yol Sk. Now Bomonti No:2, Kat:7**  
**Ofis No:58 P.K.34440 Şişli/Istanbul**  
**Phone: (212) 234 12 60 Fax: (212) 234 19 53**

**Re.: Your letter dated 21.03.2022**

Application Form for Significant Changes in Clinical Trials, and the Informed Consent Form (Adolescent, Parent and Adult) (dated 10.03.2022, Version 1.0, Turkish), Insurance Addendum (Policy No: TRLSA40621, Addendum No: 1, Start Date: 01.04.2022 - End Date: 01.04.2027, Issue Date: 01.04.2022), Insurance Certificate (Policy No: TRLSA40621, Start Date: 01.04.2022 - End Date: 01.04.2027, Issue Date: 14.03.2022), Insurance Certificate (Policy No: TRLSA40621, Start Date: 01.04.2022 - End Date: 01.04.2025, Issue Date: 14.01.2022), Insurance Policy (Policy No: TRLSA40621, Start Date: 01.04.2022 - End Date: 01.04.2025, Issue Date: 01.04.2022) for the trial "A Phase II, randomised, multi-centric, multi-national clinical trial to evaluate the efficacy, tolerability and safety of a fixed dose combination of Spironolactone/Pioglitazone/Metformin (SPIOMET) for adolescent girls and young adult women (AYAs) with polycystic ovary syndrome (PCOS)" with file number 2022/137, whose coordinator and principal investigator is Prof. Dr. Fatma Feyza DARENDELİLER, Faculty Member of Istanbul University, Istanbul Faculty of Medicine, Department of Child Health and Diseases, was assessed during meeting 07 of our Committee, held on 08.04.2022 and found compliant.

I kindly request that a copy of our letter be sent to the coordinator and/or the principal investigator, the sponsor and other sites.

**Prof. Dr. A.Yağız ÜRESİN**

**Istanbul Faculty of Medicine Clinical**

**Research Ethics**

**Committee Chairman**

Attachment "In accordance with the Covid 19 pandemic measures, an online meeting was held and the meeting was attended by 11 members who made an unanimous decision."
